# Supplementary material for: Transcriptome, Phenotypic, and Virulence Analysis of Streptococcus sanguinis SK36 Wild Type and Its CcpA-Null Derivative (ΔCcpA)
Source: PubMed Central journal article supplement (PMC6904348; doi:10.3389/fcimb.2019.00411), 2019-12-04
Supplement: Data_Sheet_3.pdf [file Data_Sheet_3.pdf]

## Supplementary file 3

### Regulon of CcpA in *Streptococcus sanguinis* SK36

#### Properties

|                     |                                                        |
|---------------------|--------------------------------------------------------|
| Regulator type:     | Transcription factor                                   |
| TF locus tag:       | <a href="#">SSA_1576</a>                               |
| Regulator family:   | LacI                                                   |
| Regulation mode:    |                                                        |
| Biological process: | Global catabolite repression                           |
| Effector:           | Fructose-1,6-bisphosphate; HPr, phosphocarrier protein |
| Regulog:            | <a href="#">CcpA - Streptococcaceae</a>                |

#### Statistics of regulated genes:

|           |     |
|-----------|-----|
| - Genes   | 133 |
| - Operons | 66  |

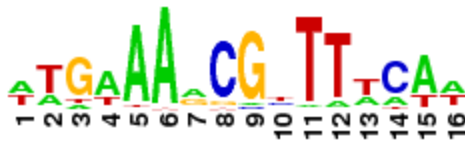

Built upon 968 sites [\[SEE MORE\]](#)

#### Member of regulog collections

- By taxonomy - [Streptococcaceae](#)
- By transcription factor - [CcpA](#)
- By TF family - [LacI](#)
- By effector - [Fructose-1,6-bisphosphate](#)
- By effector - [HPr, phosphocarrier protein](#)
- By pathway - [Global catabolite repression](#)

#### Regulated operons

| Locus Tag                | Name    | Function                                                                        |
|--------------------------|---------|---------------------------------------------------------------------------------|
| <a href="#">SSA_0282</a> | celX    | Cellobiose-specific PTS system, IIA component (EC 2.7.1.69)                     |
| <a href="#">SSA_0283</a> | celY    | Cellobiose-specific PTS system, cellobiose-specific IIB component (EC 2.7.1.69) |
| <a href="#">SSA_0284</a> | celZ    | Cellobiose-specific PTS system, IIC component (EC 2.7.1.69)                     |
| <a href="#">SSA_0572</a> | idlD    | L-iditol 2-dehydrogenase (EC 1.1.1.14)                                          |
| <a href="#">SSA_0267</a> | celQ    | Predicted cellobiose repressor, ROK family                                      |
| <a href="#">SSA_1960</a> | SPy0278 | Conserved hypothetical protein                                                  |

## Regulated operons

| Locus Tag                  | Name    | Function                                                                                        |
|----------------------------|---------|-------------------------------------------------------------------------------------------------|
| <a href="#">SSA_1056</a>   | fbp     | Fructose-1,6-bisphosphatase, Bacillus type (EC 3.1.3.11)                                        |
| <a href="#">SSA_0052</a>   | manR    | Predicted N-acetylgalactosamine utilization transcriptional regulator<br>ManR, GntR family      |
| <a href="#">↑ SSA_2020</a> | SUB1370 | Hypothetical protein / zinc carboxypeptidase                                                    |
| <a href="#">↑ SSA_0068</a> | adhE    | Alcohol dehydrogenase (EC 1.1.1.1); Acetaldehyde dehydrogenase (EC 1.2.1.10)                    |
| <a href="#">SSA_0456</a>   | scrA    | Sucrose-specific PTS system, IIABC component (EC 2.7.1.69)                                      |
| <a href="#">SSA_0457</a>   | scrK    | Fructokinase (EC 2.7.1.4)                                                                       |
| <a href="#">SSA_1826</a>   | glpK    | Glycerol kinase (EC 2.7.1.30)                                                                   |
| <a href="#">SSA_1827</a>   | glpD    | Alpha-glycerophosphate oxidase (EC 1.1.3.21)                                                    |
| <a href="#">SSA_1828</a>   | glpF    | Glycerol uptake facilitator protein                                                             |
| <a href="#">SSA_1577</a>   | pepQ    | Xaa-Pro dipeptidase (EC 3.4.13.9)                                                               |
| <a href="#">↑ SSA_1752</a> | treP    | Trehalose-specific PTS system, IIABC components (EC 2.7.1.69)                                   |
| <a href="#">↑ SSA_1751</a> | treA    | Trehalose-6-phosphate hydrolase (EC 3.2.1.93)                                                   |
| <a href="#">SSA_1178</a>   | acoA    | Acetoin dehydrogenase E1 component alpha-subunit (EC 1.2.4.-)                                   |
| <a href="#">SSA_1176</a>   | acoB    | Acetoin dehydrogenase E1 component beta-subunit (EC 1.2.4.-)                                    |
| <a href="#">↓ SSA_0650</a> | typA    | GTP-binding protein TypA/BipA                                                                   |
| <a href="#">↑ SSA_1615</a> |         | Alanine dehydrogenase (EC 1.4.1.1)                                                              |
| <a href="#">SSA_1137</a>   | pdhD    | Dihydrolipoamide dehydrogenase of acetoin dehydrogenase (EC 1.8.1.4)                            |
| <a href="#">↑ SSA_1138</a> | pdhA    | Acetoin dehydrogenase E1 component alpha-subunit (EC 1.2.4.-)                                   |
| <a href="#">↑ SSA_1139</a> | pdhB    | Acetoin dehydrogenase E1 component beta-subunit (EC 1.2.4.-)                                    |
| <a href="#">↑ SSA_1140</a> | pdhC    | Dihydrolipoamide acetyltransferase component (E2) of acetoin dehydrogenase complex (EC 2.3.1.-) |
| <a href="#">↑ SSA_0736</a> | arcR    | Arginine catabolism (ADI pathway) transcriptional regulator ArcR, Crp-Fnr family                |
| <a href="#">↓ SSA_0847</a> | pfk     | 6-phosphofructokinase (EC 2.7.1.11)                                                             |
| <a href="#">↓ SSA_0848</a> | pyk     | Pyruvate kinase (EC 2.7.1.40)                                                                   |
| <a href="#">↑ SSA_1918</a> | manL    | PTS system, mannose-specific IIAB components                                                    |
| <a href="#">↑ SSA_1919</a> | manM    | PTS system, mannose-specific IIC component (EC 2.7.1.69)                                        |
| <a href="#">↑ SSA_1920</a> | manN    | PTS system, mannose-specific IID component (EC 2.7.1.69)                                        |
| <a href="#">↑ SSA_1921</a> | manO    | Putative regulator of the mannose operon, ManO                                                  |
| <a href="#">↑ SSA_0391</a> | spxB    | Pyruvate oxidase (EC 1.2.3.3)                                                                   |
| <a href="#">↑ SSA_1593</a> | pepD2   | Dipeptidase (EC 3.4.-.-)                                                                        |
| <a href="#">↓ SSA_1221</a> | ldh     | L-lactate dehydrogenase (EC 1.1.1.27)                                                           |

## Regulated operons

| Locus Tag                 | Name | Function                                                                                                            |
|---------------------------|------|---------------------------------------------------------------------------------------------------------------------|
| <a href="#">↑SSA_1210</a> | yjbM | GTP pyrophosphokinase (EC 2. 7. 6. 5)                                                                               |
| <a href="#">↑SSA_1209</a> | ppnK | Predicted inorganic polyphosphate/ATP-NAD kinase                                                                    |
| <a href="#">↑SSA_1208</a> | yjbO | Similar to ribosomal large subunit pseudouridine synthase D, <i>Bacillus subtilis</i> YjbO type                     |
| <a href="#">SSA_1724</a>  | acuB | Acetoin utilization protein AcuB                                                                                    |
| <a href="#">SSA_0740</a>  | arcD | Arginine/ornithine antiporter                                                                                       |
| <a href="#">↑SSA_0741</a> | arcT | Xaa-His dipeptidase (EC 3. 4. 13. 3)                                                                                |
| <a href="#">↑SSA_1809</a> | ptsG | PTS system glucose-specific EIICBA component (EC 2. 7. 1. 69)                                                       |
| <a href="#">↑SSA_1808</a> | rgfB | Exodeoxyribonuclease III (EC 3. 1. 11. 2)                                                                           |
| <a href="#">↓SSA_1576</a> | ccpA | Carbon catabolism global transcriptional regulator CcpA, LacI family                                                |
| <a href="#">↑SSA_1753</a> | treR | Trehalose utilization transcriptional regulator TreR, GntR family                                                   |
| <a href="#">↓SSA_0688</a> | gpmA | 2, 3-bisphosphoglycerate-dependent phosphoglycerate (EC 5. 4. 2. 1)                                                 |
| <a href="#">SSA_0782</a>  | atpE | ATP synthase C chain (EC 3. 6. 3. 14)                                                                               |
| <a href="#">SSA_0783</a>  | atpB | ATP synthase A chain (EC 3. 6. 3. 14)                                                                               |
| <a href="#">SSA_0784</a>  | atpF | ATP synthase B chain (EC 3. 6. 3. 14)                                                                               |
| <a href="#">SSA_0785</a>  | atpH | ATP synthase delta chain (EC 3. 6. 3. 14)                                                                           |
| <a href="#">SSA_0786</a>  | atpA | ATP synthase alpha chain (EC 3. 6. 3. 14)                                                                           |
| <a href="#">SSA_0787</a>  | atpG | ATP synthase gamma chain (EC 3. 6. 3. 14)                                                                           |
| <a href="#">SSA_0788</a>  | atpD | ATP synthase beta chain (EC 3. 6. 3. 14)                                                                            |
| <a href="#">SSA_0789</a>  | atpC | ATP synthase epsilon chain (EC 3. 6. 3. 14)                                                                         |
| <a href="#">SSA_0842</a>  | lrgA | Antiholin-like protein LrgA                                                                                         |
| <a href="#">SSA_0843</a>  | lrgB | LrgA-associated membrane protein LrgB                                                                               |
| <a href="#">↑SSA_1298</a> | malE | Maltose/maltodextrin ABC transporter, substrate-binding protein                                                     |
| <a href="#">↑SSA_1299</a> | malF | Maltose/maltodextrin ABC transporter, permease protein 1                                                            |
| <a href="#">↑SSA_1300</a> | malG | Maltose/maltodextrin ABC transporter, permease protein 2                                                            |
| <a href="#">SSA_0049</a>  | dhaK | Phosphoenolpyruvate-dihydroxyacetone phosphotransferase (EC 2. 7. 1. 121), dihydroxyacetone binding subunit DhaK    |
| <a href="#">SSA_0050</a>  | dhaL | Phosphoenolpyruvate-dihydroxyacetone phosphotransferase (EC 2. 7. 1. 121), ADP-binding subunit DhaL                 |
| <a href="#">SSA_0051</a>  | dhaM | Phosphoenolpyruvate-dihydroxyacetone phosphotransferase (EC 2. 7. 1. 121), subunit DhaM; DHA-specific IIA component |
| <a href="#">SSA_0053</a>  | bgaC | Beta-galactosidase (EC 3. 2. 1. 23)                                                                                 |
| <a href="#">SSA_0054</a>  | agaB | Predicted galactosamine-specific PTS, EIIB component (EC 2. 7. 1. 69)                                               |
| <a href="#">SSA_0055</a>  | agaC | Predicted galactosamine-specific PTS, EIIC component (EC 2. 7. 1. 69)                                               |

## Regulated operons

| Locus Tag                 | Name  | Function                                                                                                                                                  |
|---------------------------|-------|-----------------------------------------------------------------------------------------------------------------------------------------------------------|
| <a href="#">SSA_0056</a>  | agaD  | Predicted galactosamine-specific PTS, EIID component (EC 2. 7. 1. 69)                                                                                     |
| <a href="#">SSA_0057</a>  | agaE  | Predicted galactosamine-specific PTS, EIIA component (EC 2. 7. 1. 69)                                                                                     |
| <a href="#">SSA_1834</a>  | raiA  | Ribosome-associated protein Y                                                                                                                             |
| <a href="#">SSA_1729</a>  | livJ  | Branched-chain amino acid ABC transporter, substrate-binding protein                                                                                      |
| <a href="#">SSA_1728</a>  | livH  | Branched-chain amino acid ABC transporter, permease protein 1                                                                                             |
| <a href="#">SSA_1727</a>  | livM  | Branched-chain amino acid ABC transporter, permease protein 2                                                                                             |
| <a href="#">SSA_1726</a>  | livG  | Branched-chain amino acid ABC transporter, ATP-binding protein 1                                                                                          |
| <a href="#">SSA_1725</a>  | livF  | Branched-chain amino acid ABC transporter, ATP-binding protein 2                                                                                          |
| <a href="#">SSA_1204</a>  | pgm   | Phosphoglucomutase (EC 5. 4. 2. 2)                                                                                                                        |
| <a href="#">↑SSA_1917</a> | adhB1 | Alcohol dehydrogenase (EC 1. 1. 1. 1)                                                                                                                     |
| <a href="#">↑SSA_0453</a> | pulA  | Pullulanase (EC 3. 2. 1. 41)                                                                                                                              |
| <a href="#">SSA_0775</a>  | glgB  | 1, 4-alpha-glucan (glycogen) branching enzyme, GH-13-type (EC 2. 4. 1. 18)                                                                                |
| <a href="#">↑SSA_0776</a> | glgC  | Glucose-1-phosphate adenylyltransferase (EC 2. 7. 7. 27)                                                                                                  |
| <a href="#">SSA_0777</a>  | glgD  | Glucose-1-phosphate adenylyltransferase (EC 2. 7. 7. 27)                                                                                                  |
| <a href="#">↑SSA_0778</a> | glgA  | Glycogen synthase, ADP-glucose transglucosylase (EC 2. 4. 1. 21)                                                                                          |
| <a href="#">SSA_1211</a>  | yjbK  | Adenylate cyclase                                                                                                                                         |
| <a href="#">SSA_0413</a>  | pabB  | Para-aminobenzoate synthase component I (EC 4. 1. 3. -);<br>Anthranilate/para-aminobenzoate synthases component I/<br>Chorismate binding enzyme, putative |
| <a href="#">SSA_1127</a>  | naoX  | Predicted NADH oxidase                                                                                                                                    |
| <a href="#">SSA_0772</a>  | ptsH  | Phosphotransferase system, HPr-related protein                                                                                                            |
| <a href="#">SSA_0773</a>  | ptsI  | Phosphoenolpyruvate-protein kinase, PTS system component (EC 2. 7. 3. 9)                                                                                  |
| <a href="#">SSA_2183</a>  | pgi   | Glucose-6-phosphate isomerase (EC 5. 3. 1. 9)                                                                                                             |
| <a href="#">SSA_0219</a>  | fmpA  | Predicted mannose specific PTS system, IIA component                                                                                                      |
| <a href="#">SSA_0220</a>  | fmpB  | Predicted mannose specific PTS system, IIB component                                                                                                      |
| <a href="#">SSA_0221</a>  | fmpC  | Predicted mannose specific PTS system, IIC component                                                                                                      |
| <a href="#">SSA_0222</a>  | fmpD  | Predicted mannose specific PTS system, IID component                                                                                                      |
| <a href="#">SSA_0224</a>  | fmpE  | Predicted mannose specific PTS system, putative EII component                                                                                             |
| <a href="#">SSA_0455</a>  | scrB  | Sucrose-6-phosphate hydrolase (EC 3. 2. 1. 26)                                                                                                            |
| <a href="#">SSA_0454</a>  | scrR  | Sucrose operon repressor ScrR, LacI family                                                                                                                |
| <a href="#">↑SSA_1749</a> | pf1A  | Pyruvate formate-lyase activating enzyme (EC 1. 97. 1. 4)                                                                                                 |
| <a href="#">SSA_1001</a>  | msmR  | MSM (multiple sugar metabolism) operon regulatory protein                                                                                                 |
| <a href="#">↑SSA_1949</a> | hppG  | Oligopeptide ABC transporter, periplasmic oligopeptide-binding protein<br>OppA (TC 3. A. 1. 5. 1)                                                         |

## Regulated operons

| Locus Tag                  | Name | Function                                                            |
|----------------------------|------|---------------------------------------------------------------------|
| <a href="#">↑ SSA 1002</a> | agaL | Alpha-galactosidase (EC 3. 2. 1. 22)                                |
| <a href="#">↑ SSA 1003</a> | msmE | Multiple sugar ABC transporter, substrate-binding protein           |
| <a href="#">↑ SSA 1004</a> | msmF | Multiple sugar ABC transporter, permease protein 2                  |
| <a href="#">↑ SSA 1005</a> | msmG | Multiple sugar ABC transporter, permease protein 1                  |
| <a href="#">SSA 0243</a>   |      | 2', 3'-cyclic-nucleotide 2'-phosphodiesterase (EC 3. 1. 4. 16)      |
| <a href="#">↑ SSA 1008</a> | galK | Galactokinase (EC 2. 7. 1. 6)                                       |
| <a href="#">↑ SSA 1009</a> | galT | Galactose-1-phosphate uridylyltransferase (EC 2. 7. 7. 10)          |
| <a href="#">SSA 0071</a>   | nanE | N-acetylmannosamine-6-phosphate 2-epimerase (EC 5. 1. 3. 9)         |
| <a href="#">↑ SSA 0072</a> | msmK | Multiple sugar ABC transporter, ATP-binding protein                 |
| <a href="#">SSA 0073</a>   | yjgK | Conserved hypothetical protein                                      |
| <a href="#">SSA 0074</a>   | nanU | N-acetylneuraminate ABC transporter, substrate-binding protein      |
| <a href="#">↑ SSA 0075</a> | nanV | N-acetylneuraminate ABC transporter, permease protein 1             |
| <a href="#">↑ SSA 0076</a> | nanW | N-acetylneuraminate ABC transporter, permease protein 2             |
| <a href="#">↑ SSA 0077</a> | yjhC | Predicted oxidoreductase (EC 1. 1. 1. -)                            |
| <a href="#">SSA 0078</a>   | nanA | N-acetylneuraminate lyase (EC 4. 1. 3. 3)                           |
| <a href="#">SSA 0079</a>   | nanK | N-acetylmannosamine kinase (EC 2. 7. 1. 60)                         |
| <a href="#">SSA 0081</a>   | nanR | Sialic acid utilization transcriptional regulator NanR, RpiR family |
| <a href="#">SSA 2093</a>   | sgaT | Ascorbate-specific PTS system, IIC component                        |
| <a href="#">SSA 2092</a>   | sgaB | Ascorbate-specific PTS system, IIB component (EC 2. 7. 1. 69)       |
| <a href="#">SSA 2091</a>   | sgaC | Ascorbate-specific PTS system, IIA component (EC 2. 7. 1. -)        |
| <a href="#">SSA 2090</a>   | sgaH | 3-keto-L-gulonate 6-phosphate decarboxylase (EC 4. 1. 1. 85)        |
| <a href="#">SSA 2089</a>   | sgaU | L-xylulose 5-phosphate 3-epimerase (EC 5. 1. 3. -)                  |
| <a href="#">SSA 2088</a>   | sgaE | L-ribulose-5-phosphate 4-epimerase (EC 5. 1. 3. 4)                  |
| <a href="#">SSA 0395</a>   | ascB | 6-phospho-beta-glucosidase (EC 3. 2. 1. 86)                         |
| <a href="#">↓ SSA 0886</a> | eno  | Enolase (EC 4. 2. 1. 11)                                            |
| <a href="#">↓ SSA 0885</a> | yueI | Conserved hypothetical protein                                      |
| <a href="#">SSA 1065</a>   | hex  | Beta-hexosaminidase                                                 |
| <a href="#">↑ SSA 1098</a> | yrhG | Predicted permease                                                  |
| <a href="#">↓ SSA 0192</a> | ackA | Acetate kinase (EC 2. 7. 2. 1)                                      |
| <a href="#">SSA 2040</a>   | msmK | Multiple sugar ABC transporter, ATP-binding protein                 |
| <a href="#">↑ SSA 1261</a> | rpiA | Ribose 5-phosphate isomerase A (EC 5. 3. 1. 6)                      |
| <a href="#">↑ SSA 1260</a> | deoB | Phosphopentomutase (EC 5. 4. 2. 7)                                  |
| <a href="#">↑ SSA 1259</a> | punA | Purine nucleoside phosphorylase (EC 2. 4. 2. 1)                     |

## Regulated operons

| Locus Tag                  | Name | Function                                    |
|----------------------------|------|---------------------------------------------|
| <a href="#">↑ SSA_0737</a> | arcA | Arginine deiminase (EC 3.5.3.6)             |
| <a href="#">↑ SSA_0738</a> | arcB | Ornithine carbamoyltransferase (EC 2.1.3.3) |
| <a href="#">SSA_1033</a>   | coaA | Pantothenate kinase (EC 2.7.1.33)           |

Rectangle represent an operon

The highlight represent the genes that were in the list of unigene but not among the genes found to be differentially expressed in a CcpA mutant

Arrows represent the genes that can be matched to the differentially expressed in a CcpA mutant
