# Supplementary material for: Transcriptome, Phenotypic, and Virulence Analysis of Streptococcus sanguinis SK36 Wild Type and Its CcpA-Null Derivative (ΔCcpA)
Source: Front Cell Infect Microbiol. 2019 Dec 4;9:411. doi: 10.3389/fcimb.2019.00411 (PMC6904348; doi:10.3389/fcimb.2019.00411)
Supplement: Supplementary file 4 [file Data_Sheet_4.xlsx]

## Sheet: supplementary4A
Supplementary file 4
A. The classification in GeneOntology of up-regulated
GO ID	GO Term	Term Type	Annotated	Significant	P-Value	ann.genes
GO:0008643	carbohydrate_transport	BP	22	11	7.9e-07	c132_g2;c134_g2;c184_g156;c184_g170;c184_g183;c184_g248;c184_g82;c185_g153;c246_g1;c24_g1;c276_g1
GO:0005975	carbohydrate_metabolic_process	BP	85	20	3.2e-05	c132_g2;c134_g2;c183_g106;c183_g77;c184_g141;c184_g183;c184_g248;c184_g320;c184_g63;c185_g109;c185_g153;c185_g32;c185_g50;c185_g52;c185_g70;c185_g93;c386_g1;c449_g1;c525_g1;c534_g1
GO:0044723	single-organism_carbohydrate_metabolic_process	BP	61	16	5.7e-05	c134_g2;c183_g106;c183_g77;c184_g183;c184_g248;c184_g320;c184_g63;c185_g109;c185_g32;c185_g52;c185_g70;c185_g93;c386_g1;c449_g1;c525_g1;c534_g1
GO:0009072	aromatic_amino_acid_family_metabolic_process	BP	7	5	0.00012	c184_g144;c185_g121;c185_g127;c185_g218;c286_g1
GO:0000162	tryptophan_biosynthetic_process	BP	5	4	0.00034	c185_g121;c185_g127;c185_g218;c286_g1
GO:0005977	glycogen_metabolic_process	BP	5	4	0.00034	c185_g109;c185_g52;c185_g70;c185_g93
GO:0006112	energy_reserve_metabolic_process	BP	5	4	0.00034	c185_g109;c185_g52;c185_g70;c185_g93
GO:0006568	tryptophan_metabolic_process	BP	5	4	0.00034	c185_g121;c185_g127;c185_g218;c286_g1
GO:0006586	indolalkylamine_metabolic_process	BP	5	4	0.00034	c185_g121;c185_g127;c185_g218;c286_g1
GO:0009309	amine_biosynthetic_process	BP	5	4	0.00034	c185_g121;c185_g127;c185_g218;c286_g1
GO:0015772	oligosaccharide_transport	BP	5	4	0.00034	c184_g170;c184_g183;c184_g248;c24_g1
GO:0042401	cellular_biogenic_amine_biosynthetic_process	BP	5	4	0.00034	c185_g121;c185_g127;c185_g218;c286_g1
GO:0042430	indole-containing_compound_metabolic_process	BP	5	4	0.00034	c185_g121;c185_g127;c185_g218;c286_g1
GO:0042435	indole-containing_compound_biosynthetic_process	BP	5	4	0.00034	c185_g121;c185_g127;c185_g218;c286_g1
GO:0046219	indolalkylamine_biosynthetic_process	BP	5	4	0.00034	c185_g121;c185_g127;c185_g218;c286_g1
GO:0044262	cellular_carbohydrate_metabolic_process	BP	28	9	0.00058	c134_g2;c184_g248;c184_g320;c185_g109;c185_g32;c185_g52;c185_g70;c185_g93;c525_g1
GO:0015771	trehalose_transport	BP	3	3	0.00081	c184_g170;c184_g248;c24_g1
GO:0019674	NAD_metabolic_process	BP	3	3	0.00081	c183_g13;c184_g144;c184_g63
GO:0009073	aromatic_amino_acid_family_biosynthetic_process	BP	6	4	0.00095	c185_g121;c185_g127;c185_g218;c286_g1
GO:1901606	alpha-amino_acid_catabolic_process	BP	10	5	0.00113	c102_g1;c183_g106;c183_g77;c184_g144;c184_g184
GO:0044281	small_molecule_metabolic_process	BP	233	34	0.00158	c102_g1;c154_g1;c183_g106;c183_g13;c183_g77;c183_g96;c184_g133;c184_g144;c184_g15;c184_g184;c184_g294;c184_g310;c184_g320;c184_g5;c184_g63;c184_g89;c184_g94;c185_g121;c185_g127;c185_g150;c185_g153;c185_g218;c185_g235;c185_g254;c185_g3;c185_g32;c185_g62;c192_g1;c241_g1;c286_g1;c386_g1;c449_g1;c525_g1;c534_g1
GO:0006073	cellular_glucan_metabolic_process	BP	7	4	0.00205	c185_g109;c185_g52;c185_g70;c185_g93
GO:0006576	cellular_biogenic_amine_metabolic_process	BP	7	4	0.00205	c185_g121;c185_g127;c185_g218;c286_g1
GO:0009308	amine_metabolic_process	BP	7	4	0.00205	c185_g121;c185_g127;c185_g218;c286_g1
GO:0044042	glucan_metabolic_process	BP	7	4	0.00205	c185_g109;c185_g52;c185_g70;c185_g93
GO:0044106	cellular_amine_metabolic_process	BP	7	4	0.00205	c185_g121;c185_g127;c185_g218;c286_g1
GO:0044710	single-organism_metabolic_process	BP	349	45	0.00279	c102_g1;c134_g2;c154_g1;c183_g106;c183_g13;c183_g77;c183_g96;c184_g133;c184_g141;c184_g144;c184_g15;c184_g183;c184_g184;c184_g19;c184_g248;c184_g294;c184_g310;c184_g320;c184_g5;c184_g63;c184_g71;c184_g89;c184_g94;c185_g109;c185_g121;c185_g127;c185_g150;c185_g153;c185_g218;c185_g235;c185_g242;c185_g254;c185_g3;c185_g32;c185_g52;c185_g62;c185_g70;c185_g93;c192_g1;c241_g1;c286_g1;c386_g1;c449_g1;c52…
GO:0005978	glycogen_biosynthetic_process	BP	4	3	0.00301	c185_g52;c185_g70;c185_g93
GO:0015766	disaccharide_transport	BP	4	3	0.00301	c184_g170;c184_g248;c24_g1
GO:0019363	pyridine_nucleotide_biosynthetic_process	BP	4	3	0.00301	c183_g13;c184_g144;c184_g184
GO:0072525	pyridine-containing_compound_biosynthetic_process	BP	4	3	0.00301	c183_g13;c184_g144;c184_g184
GO:0009063	cellular_amino_acid_catabolic_process	BP	12	5	0.00305	c102_g1;c183_g106;c183_g77;c184_g144;c184_g184
GO:0071702	organic_substance_transport	BP	112	19	0.00472	c132_g2;c134_g2;c183_g45;c183_g84;c183_g90;c184_g125;c184_g156;c184_g170;c184_g183;c184_g185;c184_g248;c184_g281;c184_g290;c184_g3;c184_g82;c185_g153;c246_g1;c24_g1;c276_g1
GO:0006066	alcohol_metabolic_process	BP	9	4	0.00637	c184_g320;c184_g63;c185_g32;c241_g1
GO:1901615	organic_hydroxy_compound_metabolic_process	BP	9	4	0.00637	c184_g320;c184_g63;c185_g32;c241_g1
GO:0044699	single-organism_process	BP	587	65	0.00684	c102_g1;c132_g2;c134_g2;c154_g1;c157_g1;c183_g106;c183_g13;c183_g35;c183_g45;c183_g47;c183_g77;c183_g84;c183_g90;c183_g96;c184_g125;c184_g133;c184_g141;c184_g144;c184_g15;c184_g156;c184_g170;c184_g183;c184_g184;c184_g185;c184_g19;c184_g248;c184_g281;c184_g290;c184_g292;c184_g294;c184_g310;c184_g320;c184_g5;c184_g63;c184_g71;c184_g82;c184_g89;c184_g94;c185_g1;c185_g109;c185_g121;c185_g127;c185_g15…
GO:0044712	single-organism_catabolic_process	BP	53	11	0.00735	c102_g1;c183_g106;c183_g77;c184_g144;c184_g184;c184_g248;c184_g320;c184_g63;c185_g109;c185_g153;c185_g62
GO:0044763	single-organism_cellular_process	BP	473	55	0.00809	c102_g1;c134_g2;c154_g1;c183_g106;c183_g13;c183_g35;c183_g45;c183_g47;c183_g77;c183_g84;c183_g90;c183_g96;c184_g125;c184_g133;c184_g144;c184_g15;c184_g156;c184_g170;c184_g183;c184_g184;c184_g185;c184_g248;c184_g281;c184_g290;c184_g294;c184_g310;c184_g320;c184_g5;c184_g63;c184_g82;c184_g89;c184_g94;c185_g1;c185_g109;c185_g121;c185_g127;c185_g150;c185_g153;c185_g187;c185_g218;c185_g235;c185_g242;c1…
GO:0006012	galactose_metabolic_process	BP	2	2	0.00876	c386_g1;c525_g1
GO:0006524	alanine_catabolic_process	BP	2	2	0.00876	c184_g144;c184_g184
GO:0006567	threonine_catabolic_process	BP	2	2	0.00876	c183_g106;c183_g77
GO:0009068	aspartate_family_amino_acid_catabolic_process	BP	2	2	0.00876	c183_g106;c183_g77
GO:0009080	pyruvate_family_amino_acid_catabolic_process	BP	2	2	0.00876	c184_g144;c184_g184
GO:0019359	nicotinamide_nucleotide_biosynthetic_process	BP	2	2	0.00876	c183_g13;c184_g144
GO:0044110	growth_involved_in_symbiotic_interaction	BP	2	2	0.00876	c184_g170;c24_g1
GO:0044116	growth_of_symbiont_involved_in_interaction_with_host	BP	2	2	0.00876	c184_g170;c24_g1
GO:0044117	growth_of_symbiont_in_host	BP	2	2	0.00876	c184_g170;c24_g1
GO:0098657	import_into_cell	BP	2	2	0.00876	c184_g281;c184_g82
GO:0044282	small_molecule_catabolic_process	BP	27	7	0.00947	c102_g1;c183_g106;c183_g77;c184_g144;c184_g184;c184_g320;c184_g63
GO:0005996	monosaccharide_metabolic_process	BP	21	6	0.00989	c183_g106;c183_g77;c184_g63;c386_g1;c525_g1;c534_g1
GO:0055085	transmembrane_transport	BP	79	14	0.01096	c183_g45;c183_g90;c184_g125;c184_g133;c184_g15;c184_g156;c184_g170;c184_g185;c184_g281;c184_g290;c184_g310;c184_g82;c184_g89;c24_g1
GO:0044248	cellular_catabolic_process	BP	56	11	0.01131	c102_g1;c183_g106;c183_g77;c184_g144;c184_g184;c184_g248;c184_g320;c184_g63;c185_g109;c185_g153;c185_g62
GO:0009250	glucan_biosynthetic_process	BP	6	3	0.01306	c185_g52;c185_g70;c185_g93
GO:0015991	ATP_hydrolysis_coupled_proton_transport	BP	6	3	0.01306	c184_g133;c184_g15;c184_g310
GO:0042777	plasma_membrane_ATP_synthesis_coupled_proton_transport	BP	6	3	0.01306	c184_g133;c184_g15;c184_g310
GO:0065002	intracellular_protein_transmembrane_transport	BP	6	3	0.01306	c184_g125;c184_g185;c184_g290
GO:0006754	ATP_biosynthetic_process	BP	11	4	0.01441	c184_g133;c184_g15;c184_g310;c184_g89
GO:0009145	purine_nucleoside_triphosphate_biosynthetic_process	BP	11	4	0.01441	c184_g133;c184_g15;c184_g310;c184_g89
GO:0009206	purine_ribonucleoside_triphosphate_biosynthetic_process	BP	11	4	0.01441	c184_g133;c184_g15;c184_g310;c184_g89
GO:0044264	cellular_polysaccharide_metabolic_process	BP	11	4	0.01441	c185_g109;c185_g52;c185_g70;c185_g93
GO:0016054	organic_acid_catabolic_process	BP	17	5	0.01633	c102_g1;c183_g106;c183_g77;c184_g144;c184_g184
GO:0019318	hexose_metabolic_process	BP	17	5	0.01633	c183_g106;c183_g77;c184_g63;c386_g1;c525_g1
GO:0046395	carboxylic_acid_catabolic_process	BP	17	5	0.01633	c102_g1;c183_g106;c183_g77;c184_g144;c184_g184
GO:1901565	organonitrogen_compound_catabolic_process	BP	17	5	0.01633	c102_g1;c183_g106;c183_g77;c184_g144;c184_g184
GO:0044765	single-organism_transport	BP	182	25	0.02016	c132_g2;c134_g2;c157_g1;c183_g45;c183_g47;c183_g84;c183_g90;c184_g125;c184_g133;c184_g15;c184_g156;c184_g170;c184_g183;c184_g185;c184_g248;c184_g281;c184_g290;c184_g292;c184_g310;c184_g82;c184_g89;c185_g153;c246_g1;c24_g1;c276_g1
GO:0009405	pathogenesis	BP	7	3	0.02131	c184_g170;c24_g1;c314_g1
GO:0015988	energy_coupled_proton_transmembrane_transport,_against_electrochemical_gradient	BP	7	3	0.02131	c184_g133;c184_g15;c184_g310
GO:1902578	single-organism_localization	BP	183	25	0.02159	c132_g2;c134_g2;c157_g1;c183_g45;c183_g47;c183_g84;c183_g90;c184_g125;c184_g133;c184_g15;c184_g156;c184_g170;c184_g183;c184_g185;c184_g248;c184_g281;c184_g290;c184_g292;c184_g310;c184_g82;c184_g89;c185_g153;c246_g1;c24_g1;c276_g1
GO:0006810	transport	BP	212	28	0.02258	c132_g2;c134_g2;c157_g1;c183_g45;c183_g47;c183_g84;c183_g90;c184_g125;c184_g133;c184_g15;c184_g156;c184_g170;c184_g183;c184_g185;c184_g248;c184_g281;c184_g290;c184_g292;c184_g3;c184_g310;c184_g82;c184_g89;c185_g144;c185_g153;c185_g62;c246_g1;c24_g1;c276_g1
GO:0051179	localization	BP	222	29	0.02318	c132_g2;c134_g2;c157_g1;c183_g45;c183_g47;c183_g84;c183_g90;c184_g125;c184_g133;c184_g15;c184_g156;c184_g170;c184_g183;c184_g185;c184_g248;c184_g281;c184_g290;c184_g292;c184_g3;c184_g310;c184_g320;c184_g82;c184_g89;c185_g144;c185_g153;c185_g62;c246_g1;c24_g1;c276_g1
GO:0051234	establishment_of_localization	BP	213	28	0.02406	c132_g2;c134_g2;c157_g1;c183_g45;c183_g47;c183_g84;c183_g90;c184_g125;c184_g133;c184_g15;c184_g156;c184_g170;c184_g183;c184_g185;c184_g248;c184_g281;c184_g290;c184_g292;c184_g3;c184_g310;c184_g82;c184_g89;c185_g144;c185_g153;c185_g62;c246_g1;c24_g1;c276_g1
GO:0006067	ethanol_metabolic_process	BP	3	2	0.02468	c184_g63;c241_g1
GO:0006115	ethanol_biosynthetic_process	BP	3	2	0.02468	c184_g63;c241_g1
GO:0006643	membrane_lipid_metabolic_process	BP	3	2	0.02468	c185_g242;c185_g32
GO:0009264	deoxyribonucleotide_catabolic_process	BP	3	2	0.02468	c185_g153;c185_g62
GO:0030435	sporulation_resulting_in_formation_of_a_cellular_spore	BP	3	2	0.02468	c184_g144;c184_g184
GO:0034308	primary_alcohol_metabolic_process	BP	3	2	0.02468	c184_g63;c241_g1
GO:0034309	primary_alcohol_biosynthetic_process	BP	3	2	0.02468	c184_g63;c241_g1
GO:0043952	protein_transport_by_the_Sec_complex	BP	3	2	0.02468	c184_g125;c184_g185
GO:0046165	alcohol_biosynthetic_process	BP	3	2	0.02468	c184_g63;c241_g1
GO:0046467	membrane_lipid_biosynthetic_process	BP	3	2	0.02468	c185_g242;c185_g32
GO:1901264	carbohydrate_derivative_transport	BP	3	2	0.02468	c184_g183;c184_g82
GO:1901617	organic_hydroxy_compound_biosynthetic_process	BP	3	2	0.02468	c184_g63;c241_g1
GO:0005976	polysaccharide_metabolic_process	BP	13	4	0.02697	c185_g109;c185_g52;c185_g70;c185_g93
GO:0009401	phosphoenolpyruvate-dependent_sugar_phosphotransferase_system	BP	8	3	0.03181	c184_g156;c184_g248;c184_g82
GO:0015980	energy_derivation_by_oxidation_of_organic_compounds	BP	21	5	0.03976	c184_g63;c185_g109;c185_g52;c185_g70;c185_g93
GO:0009142	nucleoside_triphosphate_biosynthetic_process	BP	15	4	0.04452	c184_g133;c184_g15;c184_g310;c184_g89
GO:0009201	ribonucleoside_triphosphate_biosynthetic_process	BP	15	4	0.04452	c184_g133;c184_g15;c184_g310;c184_g89
GO:0015985	energy_coupled_proton_transport,_down_electrochemical_gradient	BP	9	3	0.04453	c184_g133;c184_g15;c184_g310
GO:0015986	ATP_synthesis_coupled_proton_transport	BP	9	3	0.04453	c184_g133;c184_g15;c184_g310
GO:0006566	threonine_metabolic_process	BP	4	2	0.04636	c183_g106;c183_g77
GO:0009262	deoxyribonucleotide_metabolic_process	BP	4	2	0.04636	c185_g153;c185_g62
GO:0034635	glutathione_transport	BP	4	2	0.04636	c183_g45;c183_g90
GO:0034775	glutathione_transmembrane_transport	BP	4	2	0.04636	c183_g45;c183_g90
GO:0035443	tripeptide_transmembrane_transport	BP	4	2	0.04636	c183_g45;c183_g90
GO:0035672	oligopeptide_transmembrane_transport	BP	4	2	0.04636	c183_g45;c183_g90
GO:0042939	tripeptide_transport	BP	4	2	0.04636	c183_g45;c183_g90
GO:0043934	sporulation	BP	4	2	0.04636	c184_g144;c184_g184
GO:0006733	oxidoreduction_coenzyme_metabolic_process	BP	22	5	0.04775	c183_g13;c184_g144;c184_g184;c184_g63;c185_g150
GO:0006818	hydrogen_transport	BP	22	5	0.04775	c184_g133;c184_g15;c184_g281;c184_g310;c184_g89
GO:0015992	proton_transport	BP	22	5	0.04775	c184_g133;c184_g15;c184_g281;c184_g310;c184_g89
GO:0019362	pyridine_nucleotide_metabolic_process	BP	22	5	0.04775	c183_g13;c184_g144;c184_g184;c184_g63;c185_g150
GO:0072524	pyridine-containing_compound_metabolic_process	BP	22	5	0.04775	c183_g13;c184_g144;c184_g184;c184_g63;c185_g150
GO:0016757	transferase_activity,_transferring_glycosyl_groups	MF	33	12	1.2e-05	c134_g2;c184_g102;c184_g125;c185_g109;c185_g235;c185_g242;c185_g3;c185_g32;c185_g50;c185_g62;c185_g70;c185_g93
GO:0003824	catalytic_activity	MF	602	69	7.4e-05	c102_g1;c132_g2;c134_g2;c148_g1;c154_g1;c157_g1;c183_g106;c183_g108;c183_g13;c183_g35;c183_g47;c183_g77;c183_g96;c184_g102;c184_g125;c184_g133;c184_g141;c184_g144;c184_g15;c184_g156;c184_g170;c184_g183;c184_g184;c184_g19;c184_g248;c184_g294;c184_g310;c184_g320;c184_g5;c184_g57;c184_g63;c184_g71;c184_g82;c184_g89;c184_g94;c185_g1;c185_g109;c185_g121;c185_g125;c185_g127;c185_g148;c185_g150;c185_g15…
GO:0004834	tryptophan_synthase_activity	MF	5	4	0.00032	c185_g121;c185_g127;c185_g218;c286_g1
GO:0016740	transferase_activity	MF	206	32	0.00047	c132_g2;c134_g2;c183_g106;c183_g13;c183_g35;c183_g77;c184_g102;c184_g125;c184_g156;c184_g248;c184_g294;c184_g57;c184_g82;c184_g94;c185_g109;c185_g125;c185_g148;c185_g235;c185_g242;c185_g254;c185_g3;c185_g32;c185_g50;c185_g52;c185_g62;c185_g70;c185_g93;c386_g1;c449_g1;c525_g1;c534_g1;c556_g1
GO:0016758	transferase_activity,_transferring_hexosyl_groups	MF	18	7	0.00061	c134_g2;c185_g109;c185_g235;c185_g242;c185_g32;c185_g70;c185_g93
GO:0035251	UDP-glucosyltransferase_activity	MF	3	3	0.00076	c185_g32;c185_g70;c185_g93
GO:0015144	carbohydrate_transmembrane_transporter_activity	MF	14	6	0.00085	c132_g2;c184_g156;c184_g248;c184_g82;c185_g153;c276_g1
GO:1901476	carbohydrate_transporter_activity	MF	14	6	0.00085	c132_g2;c184_g156;c184_g248;c184_g82;c185_g153;c276_g1
GO:0022891	substrate-specific_transmembrane_transporter_activity	MF	72	15	0.00127	c132_g2;c183_g45;c183_g90;c184_g133;c184_g15;c184_g156;c184_g183;c184_g248;c184_g281;c184_g290;c184_g310;c184_g82;c184_g89;c185_g153;c276_g1
GO:0022804	active_transmembrane_transporter_activity	MF	52	12	0.00163	c132_g2;c184_g133;c184_g15;c184_g156;c184_g183;c184_g248;c184_g281;c184_g290;c184_g310;c184_g82;c184_g89;c185_g153
GO:0022857	transmembrane_transporter_activity	MF	91	17	0.00213	c132_g2;c183_g45;c183_g90;c184_g133;c184_g15;c184_g156;c184_g170;c184_g183;c184_g248;c184_g281;c184_g290;c184_g310;c184_g82;c184_g89;c185_g153;c24_g1;c276_g1
GO:0044769	ATPase_activity,_coupled_to_transmembrane_movement_of_ions,_rotational_mechanism	MF	8	4	0.00355	c184_g133;c184_g15;c184_g310;c184_g89
GO:0016773	phosphotransferase_activity,_alcohol_group_as_acceptor	MF	30	8	0.00405	c132_g2;c183_g13;c184_g156;c184_g248;c184_g82;c449_g1;c525_g1;c534_g1
GO:0022892	substrate-specific_transporter_activity	MF	82	15	0.00506	c132_g2;c183_g45;c183_g90;c184_g133;c184_g15;c184_g156;c184_g183;c184_g248;c184_g281;c184_g290;c184_g310;c184_g82;c184_g89;c185_g153;c276_g1
GO:0005215	transporter_activity	MF	117	19	0.00626	c132_g2;c157_g1;c183_g45;c183_g47;c183_g90;c184_g133;c184_g15;c184_g156;c184_g170;c184_g183;c184_g248;c184_g281;c184_g290;c184_g310;c184_g82;c184_g89;c185_g153;c24_g1;c276_g1
GO:0004645	phosphorylase_activity	MF	5	3	0.00664	c134_g2;c185_g109;c185_g235
GO:0000286	alanine_dehydrogenase_activity	MF	2	2	0.00845	c184_g144;c184_g184
GO:0000721	(R,R)-butanediol_dehydrogenase_activity	MF	2	2	0.00845	c184_g19;c184_g320
GO:0004176	ATP-dependent_peptidase_activity	MF	2	2	0.00845	c148_g1;c24_g1
GO:0004373	glycogen_(starch)_synthase_activity	MF	2	2	0.00845	c185_g70;c185_g93
GO:0008861	formate_C-acetyltransferase_activity	MF	2	2	0.00845	c183_g106;c183_g77
GO:0008973	phosphopentomutase_activity	MF	2	2	0.00845	c185_g153;c185_g62
GO:0009011	starch_synthase_activity	MF	2	2	0.00845	c185_g70;c185_g93
GO:0015145	monosaccharide_transmembrane_transporter_activity	MF	2	2	0.00845	c184_g82;c185_g153
GO:0016408	C-acyltransferase_activity	MF	2	2	0.00845	c183_g106;c183_g77
GO:0016453	C-acetyltransferase_activity	MF	2	2	0.00845	c183_g106;c183_g77
GO:0043875	2-ketobutyrate_formate-lyase_activity	MF	2	2	0.00845	c183_g106;c183_g77
GO:0047257	diglucosyl_diacylglycerol_synthase_activity	MF	2	2	0.00845	c185_g242;c185_g32
GO:0016836	hydro-lyase_activity	MF	15	5	0.00851	c183_g96;c185_g121;c185_g127;c185_g218;c286_g1
GO:0016772	transferase_activity,_transferring_phosphorus-containing_groups	MF	89	15	0.01126	c132_g2;c183_g13;c184_g156;c184_g248;c184_g57;c184_g82;c184_g94;c185_g125;c185_g148;c185_g254;c185_g52;c386_g1;c449_g1;c525_g1;c534_g1
GO:0046527	glucosyltransferase_activity	MF	6	3	0.0124	c185_g32;c185_g70;c185_g93
GO:0046933	proton-transporting_ATP_synthase_activity,_rotational_mechanism	MF	6	3	0.0124	c184_g133;c184_g15;c184_g310
GO:0008194	UDP-glycosyltransferase_activity	MF	11	4	0.0135	c185_g242;c185_g32;c185_g70;c185_g93
GO:0016820	hydrolase_activity,_acting_on_acid_anhydrides,_catalyzing_transmembrane_movement...	MF	38	8	0.01829	c184_g133;c184_g15;c184_g170;c184_g183;c184_g310;c184_g89;c185_g153;c24_g1
GO:0004022	alcohol_dehydrogenase_(NAD)_activity	MF	3	2	0.02381	c184_g63;c241_g1
GO:0016638	oxidoreductase_activity,_acting_on_the_CH-NH2_group_of_donors	MF	3	2	0.02381	c184_g144;c184_g184
GO:0016835	carbon-oxygen_lyase_activity	MF	19	5	0.02451	c183_g96;c185_g121;c185_g127;c185_g218;c286_g1
GO:0016407	acetyltransferase_activity	MF	8	3	0.03029	c183_g106;c183_g77;c449_g1
GO:0015399	primary_active_transmembrane_transporter_activity	MF	36	7	0.04049	c184_g133;c184_g15;c184_g183;c184_g290;c184_g310;c184_g89;c185_g153
GO:0015405	P-P-bond-hydrolysis-driven_transmembrane_transporter_activity	MF	36	7	0.04049	c184_g133;c184_g15;c184_g183;c184_g290;c184_g310;c184_g89;c185_g153
GO:0016763	transferase_activity,_transferring_pentosyl_groups	MF	9	3	0.04245	c185_g235;c185_g3;c185_g62
GO:0008982	protein-N(PI)-phosphohistidine-sugar_phosphotransferase_activity	MF	4	2	0.04478	c184_g156;c184_g82
GO:0015197	peptide_transporter_activity	MF	4	2	0.04478	c183_g45;c183_g90
GO:0015198	oligopeptide_transporter_activity	MF	4	2	0.04478	c183_g45;c183_g90
GO:0015925	galactosidase_activity	MF	4	2	0.04478	c132_g2;c134_g2
GO:0022884	macromolecule_transmembrane_transporter_activity	MF	4	2	0.04478	c184_g183;c184_g290
GO:0034634	glutathione_transmembrane_transporter_activity	MF	4	2	0.04478	c183_g45;c183_g90
GO:0035673	oligopeptide_transmembrane_transporter_activity	MF	4	2	0.04478	c183_g45;c183_g90
GO:0042887	amide_transmembrane_transporter_activity	MF	4	2	0.04478	c183_g45;c183_g90
GO:0042937	tripeptide_transporter_activity	MF	4	2	0.04478	c183_g45;c183_g90
GO:0051119	sugar_transmembrane_transporter_activity	MF	4	2	0.04478	c184_g82;c185_g153
GO:0019829	cation-transporting_ATPase_activity	MF	17	4	0.06348	c184_g133;c184_g15;c184_g310;c184_g89
GO:0016868	intramolecular_transferase_activity,_phosphotransferases	MF	5	2	0.07021	c185_g153;c185_g62
GO:0019200	carbohydrate_kinase_activity	MF	5	2	0.07021	c525_g1;c534_g1
GO:0016616	oxidoreductase_activity,_acting_on_the_CH-OH_group_of_donors,_NAD_or_NADP_as_acc...	MF	25	5	0.07222	c184_g19;c184_g320;c184_g63;c192_g1;c241_g1
GO:0042626	ATPase_activity,_coupled_to_transmembrane_movement_of_substances	MF	33	6	0.07504	c184_g133;c184_g15;c184_g183;c184_g310;c184_g89;c185_g153
GO:0043492	ATPase_activity,_coupled_to_movement_of_substances	MF	33	6	0.07504	c184_g133;c184_g15;c184_g183;c184_g310;c184_g89;c185_g153
GO:0016614	oxidoreductase_activity,_acting_on_CH-OH_group_of_donors	MF	26	5	0.08315	c184_g19;c184_g320;c184_g63;c192_g1;c241_g1
GO:0016301	kinase_activity	MF	51	8	0.08827	c183_g13;c184_g156;c184_g82;c184_g94;c185_g254;c449_g1;c525_g1;c534_g1
GO:0042623	ATPase_activity,_coupled	MF	51	8	0.08827	c148_g1;c184_g133;c184_g15;c184_g183;c184_g310;c184_g89;c185_g153;c24_g1
GO:0042625	ATPase_activity,_coupled_to_transmembrane_movement_of_ions	MF	19	4	0.0898	c184_g133;c184_g15;c184_g310;c184_g89
GO:0000030	mannosyltransferase_activity	MF	1	1	0.09246	c185_g32
GO:0003939	L-iditol_2-dehydrogenase_activity	MF	1	1	0.09246	c184_g320
GO:0003978	UDP-glucose_4-epimerase_activity	MF	1	1	0.09246	c386_g1
GO:0004139	deoxyribose-phosphate_aldolase_activity	MF	1	1	0.09246	c185_g153
GO:0004335	galactokinase_activity	MF	1	1	0.09246	c525_g1
GO:0004407	histone_deacetylase_activity	MF	1	1	0.09246	c185_g1
GO:0004470	malic_enzyme_activity	MF	1	1	0.09246	c192_g1
GO:0004471	malate_dehydrogenase_(decarboxylating)_(NAD+)_activity	MF	1	1	0.09246	c192_g1
GO:0004565	beta-galactosidase_activity	MF	1	1	0.09246	c132_g2
GO:0004731	purine-nucleoside_phosphorylase_activity	MF	1	1	0.09246	c185_g62
GO:0004751	ribose-5-phosphate_isomerase_activity	MF	1	1	0.09246	c185_g150
GO:0004815	aspartate-tRNA_ligase_activity	MF	1	1	0.09246	c154_g1
GO:0004856	xylulokinase_activity	MF	1	1	0.09246	c534_g1
GO:0005345	purine_nucleobase_transmembrane_transporter_activity	MF	1	1	0.09246	c184_g281
GO:0008108	UDP-glucose:hexose-1-phosphate_uridylyltransferase_activity	MF	1	1	0.09246	c386_g1
GO:0008374	O-acyltransferase_activity	MF	1	1	0.09246	c449_g1
GO:0008744	L-xylulokinase_activity	MF	1	1	0.09246	c534_g1
GO:0008788	alpha,alpha-phosphotrehalase_activity	MF	1	1	0.09246	c184_g248
GO:0008870	galactoside_O-acetyltransferase_activity	MF	1	1	0.09246	c449_g1
GO:0008878	glucose-1-phosphate_adenylyltransferase_activity	MF	1	1	0.09246	c185_g52
GO:0008925	maltose_O-acetyltransferase_activity	MF	1	1	0.09246	c449_g1
GO:0008990	rRNA_(guanine-N2-)-methyltransferase_activity	MF	1	1	0.09246	c185_g3
GO:0015149	hexose_transmembrane_transporter_activity	MF	1	1	0.09246	c184_g82
GO:0015205	nucleobase_transmembrane_transporter_activity	MF	1	1	0.09246	c184_g281
GO:0015207	adenine_transmembrane_transporter_activity	MF	1	1	0.09246	c184_g281
GO:0015208	guanine_transmembrane_transporter_activity	MF	1	1	0.09246	c184_g281
GO:0015221	lipopolysaccharide_transmembrane_transporter_activity	MF	1	1	0.09246	c184_g183
GO:0015437	lipopolysaccharide-transporting_ATPase_activity	MF	1	1	0.09246	c184_g183
GO:0015578	mannose_transmembrane_transporter_activity	MF	1	1	0.09246	c184_g82
GO:0015927	trehalase_activity	MF	1	1	0.09246	c184_g248
GO:0016154	pyrimidine-nucleoside_phosphorylase_activity	MF	1	1	0.09246	c185_g235
GO:0016413	O-acetyltransferase_activity	MF	1	1	0.09246	c449_g1
GO:0016615	malate_dehydrogenase_activity	MF	1	1	0.09246	c192_g1
GO:0016623	oxidoreductase_activity,_acting_on_the_aldehyde_or_oxo_group_of_donors,_oxygen_a...	MF	1	1	0.09246	c184_g294
GO:0016781	phosphotransferase_activity,_paired_acceptors	MF	1	1	0.09246	c184_g94
GO:0016990	arginine_deiminase_activity	MF	1	1	0.09246	c102_g1
GO:0022870	protein-N(PI)-phosphohistidine-mannose_phosphotransferase_system_transporter_act...	MF	1	1	0.09246	c184_g82
GO:0031220	maltodextrin_phosphorylase_activity	MF	1	1	0.09246	c185_g109
GO:0033558	protein_deacetylase_activity	MF	1	1	0.09246	c185_g1
GO:0043211	carbohydrate-transporting_ATPase_activity	MF	1	1	0.09246	c185_g153
GO:0043364	catalysis_of_free_radical_formation	MF	1	1	0.09246	c184_g141
GO:0043365	[formate-C-acetyltransferase]-activating_enzyme_activity	MF	1	1	0.09246	c184_g141
GO:0047112	pyruvate_oxidase_activity	MF	1	1	0.09246	c184_g294
GO:0047228	1,2-diacylglycerol_3-glucosyltransferase_activity	MF	1	1	0.09246	c185_g32
GO:0047639	alcohol_oxidase_activity	MF	1	1	0.09246	c184_g63
GO:0050242	pyruvate,_phosphate_dikinase_activity	MF	1	1	0.09246	c184_g94
GO:0052910	23S_rRNA_(adenine(2085)-N(6))-dimethyltransferase_activity	MF	1	1	0.09246	c556_g1
GO:0090589	protein-phosphocysteine-trehalose_phosphotransferase_system_transporter_activity	MF	1	1	0.09246	c184_g248
GO:1901505	carbohydrate_derivative_transporter_activity	MF	1	1	0.09246	c184_g183
GO:0016887	ATPase_activity	MF	79	11	0.09984	c148_g1;c157_g1;c183_g47;c184_g133;c184_g15;c184_g170;c184_g183;c184_g310;c184_g89;c185_g153;c24_g1
GO:0015078	hydrogen_ion_transmembrane_transporter_activity	MF	20	4	0.10466	c184_g133;c184_g15;c184_g310;c184_g89
GO:0016491	oxidoreductase_activity	MF	100	13	0.11766	c184_g141;c184_g144;c184_g184;c184_g19;c184_g294;c184_g320;c184_g5;c184_g63;c184_g71;c185_g187;c192_g1;c241_g1;c60_g1
GO:0008170	N-methyltransferase_activity	MF	7	2	0.13066	c185_g3;c556_g1
GO:0004553	hydrolase_activity,_hydrolyzing_O-glycosyl_compounds	MF	14	3	0.13173	c132_g2;c134_g2;c184_g248
GO:0016747	transferase_activity,_transferring_acyl_groups_other_than_amino-acyl_groups	MF	14	3	0.13173	c183_g106;c183_g77;c449_g1
GO:0000287	magnesium_ion_binding	MF	48	7	0.14499	c184_g294;c185_g153;c185_g242;c185_g254;c185_g32;c185_g62;c525_g1
GO:0016829	lyase_activity	MF	40	6	0.1553	c183_g96;c185_g121;c185_g127;c185_g153;c185_g218;c286_g1
GO:0072349	modified_amino_acid_transmembrane_transporter_activity	MF	8	2	0.16412	c183_g45;c183_g90
GO:1901682	sulfur_compound_transmembrane_transporter_activity	MF	8	2	0.16412	c183_g45;c183_g90
GO:0000179	rRNA_(adenine-N6,N6-)-dimethyltransferase_activity	MF	2	1	0.17647	c556_g1
GO:0003861	3-isopropylmalate_dehydratase_activity	MF	2	1	0.17647	c183_g96
GO:0003951	NAD+_kinase_activity	MF	2	1	0.17647	c183_g13
GO:0004557	alpha-galactosidase_activity	MF	2	1	0.17647	c134_g2
GO:0008184	glycogen_phosphorylase_activity	MF	2	1	0.17647	c185_g109
GO:0008774	acetaldehyde_dehydrogenase_(acetylating)_activity	MF	2	1	0.17647	c241_g1
GO:0008776	acetate_kinase_activity	MF	2	1	0.17647	c185_g254
GO:0008988	rRNA_(adenine-N6-)-methyltransferase_activity	MF	2	1	0.17647	c556_g1
GO:0009018	sucrose_phosphorylase_activity	MF	2	1	0.17647	c134_g2
GO:0009378	four-way_junction_helicase_activity	MF	2	1	0.17647	c241_g1
GO:0015295	solute:proton_symporter_activity	MF	2	1	0.17647	c184_g281
GO:0016435	rRNA_(guanine)_methyltransferase_activity	MF	2	1	0.17647	c185_g3
GO:0016813	hydrolase_activity,_acting_on_carbon-nitrogen_(but_not_peptide)_bonds,_in_linear...	MF	2	1	0.17647	c102_g1
GO:0016899	oxidoreductase_activity,_acting_on_the_CH-OH_group_of_donors,_oxygen_as_acceptor	MF	2	1	0.17647	c184_g63
GO:0052692	raffinose_alpha-galactosidase_activity	MF	2	1	0.17647	c134_g2
GO:0070283	radical_SAM_enzyme_activity	MF	2	1	0.17647	c184_g141
GO:0043167	ion_binding	MF	344	36	0.18334	c134_g2;c148_g1;c154_g1;c157_g1;c183_g108;c183_g13;c183_g45;c183_g96;c184_g133;c184_g141;c184_g15;c184_g170;c184_g19;c184_g290;c184_g294;c184_g310;c184_g320;c184_g5;c184_g57;c184_g63;c184_g94;c185_g1;c185_g109;c185_g153;c185_g187;c185_g242;c185_g254;c185_g32;c185_g52;c185_g62;c192_g1;c241_g1;c24_g1;c286_g1;c314_g1;c525_g1
GO:0043169	cation_binding	MF	189	21	0.19181	c134_g2;c183_g108;c183_g13;c183_g45;c183_g96;c184_g141;c184_g19;c184_g294;c184_g320;c184_g5;c184_g63;c184_g94;c185_g1;c185_g153;c185_g187;c185_g242;c185_g254;c185_g32;c185_g62;c192_g1;c525_g1
GO:0005524	ATP_binding	MF	149	17	0.19512	c148_g1;c154_g1;c157_g1;c183_g13;c184_g133;c184_g15;c184_g170;c184_g290;c184_g310;c184_g94;c185_g153;c185_g254;c185_g52;c241_g1;c24_g1;c314_g1;c525_g1
GO:0032559	adenyl_ribonucleotide_binding	MF	149	17	0.19512	c148_g1;c154_g1;c157_g1;c183_g13;c184_g133;c184_g15;c184_g170;c184_g290;c184_g310;c184_g94;c185_g153;c185_g254;c185_g52;c241_g1;c24_g1;c314_g1;c525_g1
GO:0015075	ion_transmembrane_transporter_activity	MF	52	7	0.19577	c183_g45;c183_g90;c184_g133;c184_g15;c184_g281;c184_g310;c184_g89
GO:0008324	cation_transmembrane_transporter_activity	MF	43	6	0.19821	c183_g45;c184_g133;c184_g15;c184_g281;c184_g310;c184_g89
GO:0003887	DNA-directed_DNA_polymerase_activity	MF	9	2	0.19889	c185_g125;c185_g148
GO:0008649	rRNA_methyltransferase_activity	MF	9	2	0.19889	c185_g3;c556_g1
GO:0034061	DNA_polymerase_activity	MF	9	2	0.19889	c185_g125;c185_g148
GO:0030554	adenyl_nucleotide_binding	MF	150	17	0.20344	c148_g1;c154_g1;c157_g1;c183_g13;c184_g133;c184_g15;c184_g170;c184_g290;c184_g310;c184_g94;c185_g153;c185_g254;c185_g52;c241_g1;c24_g1;c314_g1;c525_g1
GO:0015077	monovalent_inorganic_cation_transmembrane_transporter_activity	MF	26	4	0.21328	c184_g133;c184_g15;c184_g310;c184_g89
GO:0016779	nucleotidyltransferase_activity	MF	26	4	0.21328	c185_g125;c185_g148;c185_g52;c386_g1
GO:0022890	inorganic_cation_transmembrane_transporter_activity	MF	35	5	0.21535	c183_g45;c184_g133;c184_g15;c184_g310;c184_g89
GO:0016746	transferase_activity,_transferring_acyl_groups	MF	18	3	0.22744	c183_g106;c183_g77;c449_g1
GO:0008408	3'-5'_exonuclease_activity	MF	10	2	0.23443	c185_g125;c185_g148
GO:0051287	NAD_binding	MF	10	2	0.23443	c185_g1;c192_g1
GO:0048037	cofactor_binding	MF	55	7	0.23802	c184_g144;c184_g294;c185_g1;c185_g109;c192_g1;c286_g1;c386_g1
GO:0046872	metal_ion_binding	MF	185	20	0.24142	c183_g108;c183_g13;c183_g45;c183_g96;c184_g141;c184_g19;c184_g294;c184_g320;c184_g5;c184_g63;c184_g94;c185_g1;c185_g153;c185_g187;c185_g242;c185_g254;c185_g32;c185_g62;c192_g1;c525_g1
GO:0017111	nucleoside-triphosphatase_activity	MF	105	12	0.2522	c148_g1;c157_g1;c183_g47;c184_g133;c184_g15;c184_g170;c184_g183;c184_g310;c184_g89;c185_g153;c241_g1;c24_g1
GO:0008320	protein_transmembrane_transporter_activity	MF	3	1	0.2528	c184_g290
GO:0008565	protein_transporter_activity	MF	3	1	0.2528	c184_g290
GO:0015099	nickel_cation_transmembrane_transporter_activity	MF	3	1	0.2528	c183_g45
GO:0015293	symporter_activity	MF	3	1	0.2528	c184_g281
GO:0015294	solute:cation_symporter_activity	MF	3	1	0.2528	c184_g281
GO:0015450	P-P-bond-hydrolysis-driven_protein_transmembrane_transporter_activity	MF	3	1	0.2528	c184_g290
GO:0016433	rRNA_(adenine)_methyltransferase_activity	MF	3	1	0.2528	c556_g1
GO:0019213	deacetylase_activity	MF	3	1	0.2528	c185_g1
GO:0030976	thiamine_pyrophosphate_binding	MF	3	1	0.2528	c184_g294
GO:0036442	hydrogen-exporting_ATPase_activity	MF	3	1	0.2528	c184_g133
GO:0046961	proton-transporting_ATPase_activity,_rotational_mechanism	MF	3	1	0.2528	c184_g133
GO:0051065	CTP_reductase_activity	MF	3	1	0.2528	c184_g5
GO:0090563	protein-phosphocysteine-sugar_phosphotransferase_activity	MF	3	1	0.2528	c184_g248
GO:0016866	intramolecular_transferase_activity	MF	11	2	0.27033	c185_g153;c185_g62
GO:0051539	4_iron,_4_sulfur_cluster_binding	MF	11	2	0.27033	c183_g96;c184_g141
GO:0016462	pyrophosphatase_activity	MF	109	12	0.29771	c148_g1;c157_g1;c183_g47;c184_g133;c184_g15;c184_g170;c184_g183;c184_g310;c184_g89;c185_g153;c241_g1;c24_g1
GO:0016818	hydrolase_activity,_acting_on_acid_anhydrides,_in_phosphorus-containing_anhydrid...	MF	109	12	0.29771	c148_g1;c157_g1;c183_g47;c184_g133;c184_g15;c184_g170;c184_g183;c184_g310;c184_g89;c185_g153;c241_g1;c24_g1
GO:0030170	pyridoxal_phosphate_binding	MF	12	2	0.30622	c185_g109;c286_g1
GO:0016817	hydrolase_activity,_acting_on_acid_anhydrides	MF	110	12	0.30947	c148_g1;c157_g1;c183_g47;c184_g133;c184_g15;c184_g170;c184_g183;c184_g310;c184_g89;c185_g153;c241_g1;c24_g1
GO:0004748	ribonucleoside-diphosphate_reductase_activity,_thioredoxin_disulfide_as_acceptor	MF	4	1	0.32213	c184_g5
GO:0008998	ribonucleoside-triphosphate_reductase_activity	MF	4	1	0.32213	c184_g5
GO:0015926	glucosidase_activity	MF	4	1	0.32213	c184_g248
GO:0016151	nickel_cation_binding	MF	4	1	0.32213	c183_g45
GO:0016857	racemase_and_epimerase_activity,_acting_on_carbohydrates_and_derivatives	MF	4	1	0.32213	c386_g1
GO:0061731	ribonucleoside-diphosphate_reductase_activity	MF	4	1	0.32213	c184_g5
GO:0070566	adenylyltransferase_activity	MF	4	1	0.32213	c185_g52
GO:0016798	hydrolase_activity,_acting_on_glycosyl_bonds	MF	22	3	0.33255	c132_g2;c134_g2;c184_g248
GO:0043168	anion_binding	MF	206	21	0.33746	c148_g1;c154_g1;c157_g1;c183_g13;c184_g133;c184_g15;c184_g170;c184_g290;c184_g294;c184_g310;c184_g94;c185_g109;c185_g153;c185_g254;c185_g52;c185_g62;c241_g1;c24_g1;c286_g1;c314_g1;c525_g1
GO:0001882	nucleoside_binding	MF	175	18	0.34184	c148_g1;c154_g1;c157_g1;c183_g13;c184_g133;c184_g15;c184_g170;c184_g290;c184_g310;c184_g94;c185_g153;c185_g254;c185_g52;c185_g62;c241_g1;c24_g1;c314_g1;c525_g1
GO:0008233	peptidase_activity	MF	52	6	0.34676	c148_g1;c157_g1;c183_g108;c185_g206;c24_g1;c314_g1
GO:0008514	organic_anion_transmembrane_transporter_activity	MF	14	2	0.3768	c183_g45;c183_g90
GO:0016728	oxidoreductase_activity,_acting_on_CH_or_CH2_groups,_disulfide_as_acceptor	MF	5	1	0.38511	c184_g5
GO:0016832	aldehyde-lyase_activity	MF	5	1	0.38511	c185_g153
GO:0016861	intramolecular_oxidoreductase_activity,_interconverting_aldoses_and_ketoses	MF	5	1	0.38511	c185_g150
GO:0019842	vitamin_binding	MF	5	1	0.38511	c184_g294
GO:0070569	uridylyltransferase_activity	MF	5	1	0.38511	c386_g1
GO:0000166	nucleotide_binding	MF	234	23	0.40306	c148_g1;c154_g1;c157_g1;c183_g13;c183_g30;c184_g133;c184_g144;c184_g15;c184_g170;c184_g290;c184_g310;c184_g57;c184_g94;c185_g1;c185_g153;c185_g254;c185_g52;c185_g62;c192_g1;c241_g1;c24_g1;c314_g1;c525_g1
GO:1901265	nucleoside_phosphate_binding	MF	234	23	0.40306	c148_g1;c154_g1;c157_g1;c183_g13;c183_g30;c184_g133;c184_g144;c184_g15;c184_g170;c184_g290;c184_g310;c184_g57;c184_g94;c185_g1;c185_g153;c185_g254;c185_g52;c185_g62;c192_g1;c241_g1;c24_g1;c314_g1;c525_g1
GO:0036094	small_molecule_binding	MF	245	24	0.40641	c148_g1;c154_g1;c157_g1;c183_g13;c183_g30;c184_g133;c184_g144;c184_g15;c184_g170;c184_g290;c184_g294;c184_g310;c184_g57;c184_g94;c185_g1;c185_g153;c185_g254;c185_g52;c185_g62;c192_g1;c241_g1;c24_g1;c314_g1;c525_g1
GO:0004527	exonuclease_activity	MF	15	2	0.41105	c185_g125;c185_g148
GO:0008173	RNA_methyltransferase_activity	MF	15	2	0.41105	c185_g3;c556_g1
GO:0016903	oxidoreductase_activity,_acting_on_the_aldehyde_or_oxo_group_of_donors	MF	15	2	0.41105	c184_g294;c241_g1
GO:0051536	iron-sulfur_cluster_binding	MF	15	2	0.41105	c183_g96;c184_g141
GO:0051540	metal_cluster_binding	MF	15	2	0.41105	c183_g96;c184_g141
GO:0097367	carbohydrate_derivative_binding	MF	183	18	0.42501	c148_g1;c154_g1;c157_g1;c183_g13;c184_g133;c184_g15;c184_g170;c184_g290;c184_g310;c184_g94;c185_g153;c185_g254;c185_g52;c185_g62;c241_g1;c24_g1;c314_g1;c525_g1
GO:0016853	isomerase_activity	MF	36	4	0.43059	c185_g150;c185_g153;c185_g62;c386_g1
GO:0001883	purine_nucleoside_binding	MF	173	17	0.43179	c148_g1;c154_g1;c157_g1;c183_g13;c184_g133;c184_g15;c184_g170;c184_g290;c184_g310;c184_g94;c185_g153;c185_g254;c185_g52;c241_g1;c24_g1;c314_g1;c525_g1
GO:0032550	purine_ribonucleoside_binding	MF	173	17	0.43179	c148_g1;c154_g1;c157_g1;c183_g13;c184_g133;c184_g15;c184_g170;c184_g290;c184_g310;c184_g94;c185_g153;c185_g254;c185_g52;c241_g1;c24_g1;c314_g1;c525_g1
GO:0032555	purine_ribonucleotide_binding	MF	173	17	0.43179	c148_g1;c154_g1;c157_g1;c183_g13;c184_g133;c184_g15;c184_g170;c184_g290;c184_g310;c184_g94;c185_g153;c185_g254;c185_g52;c241_g1;c24_g1;c314_g1;c525_g1
GO:0035639	purine_ribonucleoside_triphosphate_binding	MF	173	17	0.43179	c148_g1;c154_g1;c157_g1;c183_g13;c184_g133;c184_g15;c184_g170;c184_g290;c184_g310;c184_g94;c185_g153;c185_g254;c185_g52;c241_g1;c24_g1;c314_g1;c525_g1
GO:0016725	oxidoreductase_activity,_acting_on_CH_or_CH2_groups	MF	6	1	0.44231	c184_g5
GO:1901681	sulfur_compound_binding	MF	6	1	0.44231	c184_g294
GO:0017076	purine_nucleotide_binding	MF	174	17	0.44262	c148_g1;c154_g1;c157_g1;c183_g13;c184_g133;c184_g15;c184_g170;c184_g290;c184_g310;c184_g94;c185_g153;c185_g254;c185_g52;c241_g1;c24_g1;c314_g1;c525_g1
GO:0032549	ribonucleoside_binding	MF	174	17	0.44262	c148_g1;c154_g1;c157_g1;c183_g13;c184_g133;c184_g15;c184_g170;c184_g290;c184_g310;c184_g94;c185_g153;c185_g254;c185_g52;c241_g1;c24_g1;c314_g1;c525_g1
GO:0008237	metallopeptidase_activity	MF	16	2	0.44438	c183_g108;c185_g206
GO:0032553	ribonucleotide_binding	MF	177	17	0.47515	c148_g1;c154_g1;c157_g1;c183_g13;c184_g133;c184_g15;c184_g170;c184_g290;c184_g310;c184_g94;c185_g153;c185_g254;c185_g52;c241_g1;c24_g1;c314_g1;c525_g1
GO:0003678	DNA_helicase_activity	MF	7	1	0.49425	c241_g1
GO:0015291	secondary_active_transmembrane_transporter_activity	MF	7	1	0.49425	c184_g281
GO:0016774	phosphotransferase_activity,_carboxyl_group_as_acceptor	MF	7	1	0.49425	c185_g254
GO:0016811	hydrolase_activity,_acting_on_carbon-nitrogen_(but_not_peptide)_bonds,_in_linear...	MF	7	1	0.49425	c185_g1
GO:0016854	racemase_and_epimerase_activity	MF	7	1	0.49425	c386_g1
GO:0016860	intramolecular_oxidoreductase_activity	MF	7	1	0.49425	c185_g150
GO:0046915	transition_metal_ion_transmembrane_transporter_activity	MF	7	1	0.49425	c183_g45
GO:0005886	plasma_membrane	CC	160	22	0.0029	c132_g2;c134_g2;c183_g45;c183_g84;c183_g90;c184_g125;c184_g132;c184_g144;c184_g156;c184_g170;c184_g184;c184_g185;c184_g248;c184_g281;c184_g290;c184_g292;c184_g82;c185_g153;c185_g32;c246_g1;c24_g1;c276_g1
GO:0033178	proton-transporting_two-sector_ATPase_complex,_catalytic_domain	CC	6	3	0.0082	c184_g133;c184_g15;c184_g310
GO:0016020	membrane	CC	302	33	0.009	c132_g2;c134_g2;c157_g1;c183_g106;c183_g45;c183_g47;c183_g77;c183_g84;c183_g90;c184_g125;c184_g132;c184_g133;c184_g144;c184_g15;c184_g156;c184_g170;c184_g183;c184_g184;c184_g185;c184_g248;c184_g281;c184_g290;c184_g292;c184_g310;c184_g324;c184_g82;c185_g153;c185_g32;c185_g62;c241_g1;c246_g1;c24_g1;c276_g1
GO:0071944	cell_periphery	CC	186	22	0.0206	c132_g2;c134_g2;c183_g45;c183_g84;c183_g90;c184_g125;c184_g132;c184_g144;c184_g156;c184_g170;c184_g184;c184_g185;c184_g248;c184_g281;c184_g290;c184_g292;c184_g82;c185_g153;c185_g32;c246_g1;c24_g1;c276_g1
GO:0016469	proton-transporting_two-sector_ATPase_complex	CC	10	3	0.039	c184_g133;c184_g15;c184_g310
GO:0005887	integral_component_of_plasma_membrane	CC	13	3	0.0783	c184_g248;c184_g281;c184_g82
GO:0033176	proton-transporting_V-type_ATPase_complex	CC	1	1	0.0801	c184_g133
GO:0033180	proton-transporting_V-type_ATPase,_V1_domain	CC	1	1	0.0801	c184_g133
GO:0044459	plasma_membrane_part	CC	39	6	0.0822	c184_g170;c184_g248;c184_g281;c184_g82;c246_g1;c24_g1
GO:0031226	intrinsic_component_of_plasma_membrane	CC	15	3	0.1112	c184_g248;c184_g281;c184_g82
GO:0098796	membrane_protein_complex	CC	33	5	0.1153	c184_g133;c184_g15;c184_g170;c184_g310;c24_g1
GO:0005623	cell	CC	569	49	0.124	c102_g1;c132_g2;c134_g2;c148_g1;c154_g1;c183_g106;c183_g108;c183_g13;c183_g45;c183_g77;c183_g84;c183_g90;c183_g96;c184_g125;c184_g132;c184_g141;c184_g144;c184_g156;c184_g170;c184_g183;c184_g184;c184_g185;c184_g248;c184_g281;c184_g290;c184_g292;c184_g294;c184_g310;c184_g320;c184_g5;c184_g63;c184_g82;c185_g109;c185_g125;c185_g148;c185_g153;c185_g187;c185_g254;c185_g3;c185_g32;c185_g62;c192_g1;c241_…
GO:0005829	cytosol	CC	118	13	0.1291	c148_g1;c183_g106;c183_g77;c183_g96;c184_g141;c184_g144;c184_g184;c184_g248;c184_g82;c185_g109;c192_g1;c241_g1;c24_g1
GO:0044425	membrane_part	CC	142	15	0.1393	c134_g2;c184_g125;c184_g133;c184_g15;c184_g156;c184_g170;c184_g183;c184_g185;c184_g248;c184_g281;c184_g310;c184_g82;c185_g153;c246_g1;c24_g1
GO:0044464	cell_part	CC	558	48	0.1455	c102_g1;c132_g2;c134_g2;c148_g1;c154_g1;c183_g106;c183_g108;c183_g13;c183_g45;c183_g77;c183_g84;c183_g90;c183_g96;c184_g125;c184_g132;c184_g141;c184_g144;c184_g156;c184_g170;c184_g183;c184_g184;c184_g185;c184_g248;c184_g281;c184_g290;c184_g292;c184_g294;c184_g310;c184_g320;c184_g5;c184_g63;c184_g82;c185_g109;c185_g125;c185_g148;c185_g153;c185_g254;c185_g3;c185_g32;c185_g62;c192_g1;c241_g1;c246_g1…
GO:0009316	3-isopropylmalate_dehydratase_complex	CC	2	1	0.1539	c183_g96
GO:0031514	motile_cilium	CC	2	1	0.1539	c184_g320
GO:0005929	cilium	CC	3	1	0.2219	c184_g320
GO:0043190	ATP-binding_cassette_(ABC)_transporter_complex	CC	12	2	0.2488	c184_g170;c24_g1
GO:0098533	ATPase_dependent_transmembrane_transport_complex	CC	12	2	0.2488	c184_g170;c24_g1
GO:1904564	Nbp35-Cfd1_ATPase_complex	CC	12	2	0.2488	c184_g170;c24_g1
GO:0031250	anaerobic_ribonucleoside-triphosphate_reductase_complex	CC	4	1	0.2845	c184_g5
GO:1902495	transmembrane_transporter_complex	CC	15	2	0.3415	c184_g170;c24_g1
GO:1990351	transporter_complex	CC	15	2	0.3415	c184_g170;c24_g1
GO:0098797	plasma_membrane_protein_complex	CC	17	2	0.4015	c184_g170;c24_g1
GO:0016021	integral_component_of_membrane	CC	124	11	0.406	c134_g2;c184_g125;c184_g156;c184_g170;c184_g185;c184_g248;c184_g281;c184_g82;c185_g153;c246_g1;c24_g1
GO:0031224	intrinsic_component_of_membrane	CC	127	11	0.4407	c134_g2;c184_g125;c184_g156;c184_g170;c184_g185;c184_g248;c184_g281;c184_g82;c185_g153;c246_g1;c24_g1
GO:0097458	neuron_part	CC	7	1	0.4442	c246_g1
Term type	GO classification（BP：biological process, CC: cellular component and MF:molecular function）
P-value	Statistical significance was indicated when the P value was below 0.05.

## Sheet: supplementary4B
Supplementary File4
B. The classification in GeneOntology of down-regulated
GO ID	GO Term	Term Type	Annotated	Significant	P-Value	ann.genes
GO:0006526	arginine_biosynthetic_process	BP	11	6	1.9e-05	c184_g202;c184_g204;c184_g230;c184_g30;c184_g315;c184_g80
GO:0006525	arginine_metabolic_process	BP	12	6	3.7e-05	c184_g202;c184_g204;c184_g230;c184_g30;c184_g315;c184_g80
GO:0006096	glycolytic_process	BP	13	6	6.5e-05	c183_g105;c184_g60;c185_g110;c185_g14;c185_g214;c185_g76
GO:0006165	nucleoside_diphosphate_phosphorylation	BP	13	6	6.5e-05	c183_g105;c184_g60;c185_g110;c185_g14;c185_g214;c185_g76
GO:0006757	ATP_generation_from_ADP	BP	13	6	6.5e-05	c183_g105;c184_g60;c185_g110;c185_g14;c185_g214;c185_g76
GO:0009135	purine_nucleoside_diphosphate_metabolic_process	BP	14	6	0.00011	c183_g105;c184_g60;c185_g110;c185_g14;c185_g214;c185_g76
GO:0009179	purine_ribonucleoside_diphosphate_metabolic_process	BP	14	6	0.00011	c183_g105;c184_g60;c185_g110;c185_g14;c185_g214;c185_g76
GO:0009185	ribonucleoside_diphosphate_metabolic_process	BP	14	6	0.00011	c183_g105;c184_g60;c185_g110;c185_g14;c185_g214;c185_g76
GO:0046031	ADP_metabolic_process	BP	14	6	0.00011	c183_g105;c184_g60;c185_g110;c185_g14;c185_g214;c185_g76
GO:0009132	nucleoside_diphosphate_metabolic_process	BP	15	6	0.00017	c183_g105;c184_g60;c185_g110;c185_g14;c185_g214;c185_g76
GO:0046939	nucleotide_phosphorylation	BP	16	6	0.00026	c183_g105;c184_g60;c185_g110;c185_g14;c185_g214;c185_g76
GO:0006090	pyruvate_metabolic_process	BP	17	6	0.00038	c183_g105;c184_g60;c185_g110;c185_g14;c185_g214;c185_g76
GO:0009084	glutamine_family_amino_acid_biosynthetic_process	BP	17	6	0.00038	c184_g202;c184_g204;c184_g230;c184_g30;c184_g315;c184_g80
GO:0046496	nicotinamide_nucleotide_metabolic_process	BP	20	6	0.00104	c183_g105;c184_g60;c185_g110;c185_g14;c185_g214;c185_g76
GO:0009064	glutamine_family_amino_acid_metabolic_process	BP	28	7	0.00127	c184_g202;c184_g204;c184_g230;c184_g30;c184_g315;c184_g80;c185_g214
GO:0006733	oxidoreduction_coenzyme_metabolic_process	BP	22	6	0.0018	c183_g105;c184_g60;c185_g110;c185_g14;c185_g214;c185_g76
GO:0019362	pyridine_nucleotide_metabolic_process	BP	22	6	0.0018	c183_g105;c184_g60;c185_g110;c185_g14;c185_g214;c185_g76
GO:0072524	pyridine-containing_compound_metabolic_process	BP	22	6	0.0018	c183_g105;c184_g60;c185_g110;c185_g14;c185_g214;c185_g76
GO:1901576	organic_substance_biosynthetic_process	BP	355	33	0.00316	c183_g105;c183_g117;c183_g63;c183_g68;c184_g126;c184_g202;c184_g204;c184_g217;c184_g230;c184_g26;c184_g295;c184_g30;c184_g315;c184_g58;c184_g60;c184_g80;c185_g110;c185_g126;c185_g137;c185_g146;c185_g158;c185_g162;c185_g189;c185_g204;c185_g212;c185_g214;c185_g249;c185_g257;c185_g63;c185_g65;c185_g76;c368_g1;c377_g1
GO:0044724	single-organism_carbohydrate_catabolic_process	BP	25	6	0.00368	c183_g105;c184_g60;c185_g110;c185_g14;c185_g214;c185_g76
GO:0016052	carbohydrate_catabolic_process	BP	26	6	0.00454	c183_g105;c184_g60;c185_g110;c185_g14;c185_g214;c185_g76
GO:0009058	biosynthetic_process	BP	362	33	0.00464	c183_g105;c183_g117;c183_g63;c183_g68;c184_g126;c184_g202;c184_g204;c184_g217;c184_g230;c184_g26;c184_g295;c184_g30;c184_g315;c184_g58;c184_g60;c184_g80;c185_g110;c185_g126;c185_g137;c185_g146;c185_g158;c185_g162;c185_g189;c185_g204;c185_g212;c185_g214;c185_g249;c185_g257;c185_g63;c185_g65;c185_g76;c368_g1;c377_g1
GO:0006163	purine_nucleotide_metabolic_process	BP	55	9	0.00607	c183_g105;c184_g26;c184_g60;c185_g110;c185_g14;c185_g214;c185_g257;c185_g65;c185_g76
GO:0072521	purine-containing_compound_metabolic_process	BP	58	9	0.00872	c183_g105;c184_g26;c184_g60;c185_g110;c185_g14;c185_g214;c185_g257;c185_g65;c185_g76
GO:0009150	purine_ribonucleotide_metabolic_process	BP	50	8	0.01123	c183_g105;c184_g60;c185_g110;c185_g14;c185_g214;c185_g257;c185_g65;c185_g76
GO:0032787	monocarboxylic_acid_metabolic_process	BP	31	6	0.01129	c183_g105;c184_g60;c185_g110;c185_g14;c185_g214;c185_g76
GO:0000413	protein_peptidyl-prolyl_isomerization	BP	3	2	0.01171	c185_g65;c185_g99
GO:0018208	peptidyl-proline_modification	BP	3	2	0.01171	c185_g65;c185_g99
GO:0044249	cellular_biosynthetic_process	BP	341	30	0.01594	c183_g105;c183_g117;c183_g63;c184_g126;c184_g202;c184_g204;c184_g217;c184_g230;c184_g26;c184_g295;c184_g30;c184_g315;c184_g58;c184_g80;c185_g126;c185_g137;c185_g146;c185_g158;c185_g162;c185_g189;c185_g204;c185_g212;c185_g214;c185_g249;c185_g257;c185_g63;c185_g65;c185_g76;c368_g1;c377_g1
GO:0009126	purine_nucleoside_monophosphate_metabolic_process	BP	44	7	0.0183	c183_g105;c184_g60;c185_g110;c185_g14;c185_g214;c185_g257;c185_g76
GO:0009167	purine_ribonucleoside_monophosphate_metabolic_process	BP	44	7	0.0183	c183_g105;c184_g60;c185_g110;c185_g14;c185_g214;c185_g257;c185_g76
GO:0019219	regulation_of_nucleobase-containing_compound_metabolic_process	BP	44	7	0.0183	c183_g63;c184_g217;c184_g58;c184_g60;c185_g126;c185_g162;c185_g204
GO:0006829	zinc_II_ion_transport	BP	4	2	0.02245	c184_g155;c185_g13
GO:0006351	transcription,_DNA-templated	BP	46	7	0.0231	c183_g63;c184_g217;c184_g58;c185_g126;c185_g162;c185_g204;c368_g1
GO:0097659	nucleic_acid-templated_transcription	BP	46	7	0.0231	c183_g63;c184_g217;c184_g58;c185_g126;c185_g162;c185_g204;c368_g1
GO:0009144	purine_nucleoside_triphosphate_metabolic_process	BP	36	6	0.02323	c183_g105;c184_g60;c185_g110;c185_g14;c185_g214;c185_g76
GO:0009205	purine_ribonucleoside_triphosphate_metabolic_process	BP	36	6	0.02323	c183_g105;c184_g60;c185_g110;c185_g14;c185_g214;c185_g76
GO:0046034	ATP_metabolic_process	BP	36	6	0.02323	c183_g105;c184_g60;c185_g110;c185_g14;c185_g214;c185_g76
GO:0009123	nucleoside_monophosphate_metabolic_process	BP	59	8	0.02932	c183_g105;c184_g60;c185_g110;c185_g14;c185_g214;c185_g257;c185_g65;c185_g76
GO:0009161	ribonucleoside_monophosphate_metabolic_process	BP	59	8	0.02932	c183_g105;c184_g60;c185_g110;c185_g14;c185_g214;c185_g257;c185_g65;c185_g76
GO:0006091	generation_of_precursor_metabolites_and_energy	BP	38	6	0.02978	c183_g105;c184_g60;c185_g110;c185_g14;c185_g214;c185_g76
GO:0045184	establishment_of_protein_localization	BP	38	6	0.02978	c183_g109;c184_g192;c184_g325;c184_g58;c185_g78;c185_g99
GO:0006355	regulation_of_transcription,_DNA-templated	BP	39	6	0.03347	c183_g63;c184_g217;c184_g58;c185_g126;c185_g162;c185_g204
GO:0008104	protein_localization	BP	39	6	0.03347	c183_g109;c184_g192;c184_g325;c184_g58;c185_g78;c185_g99
GO:0009141	nucleoside_triphosphate_metabolic_process	BP	39	6	0.03347	c183_g105;c184_g60;c185_g110;c185_g14;c185_g214;c185_g76
GO:0009199	ribonucleoside_triphosphate_metabolic_process	BP	39	6	0.03347	c183_g105;c184_g60;c185_g110;c185_g14;c185_g214;c185_g76
GO:1903506	regulation_of_nucleic_acid-templated_transcription	BP	39	6	0.03347	c183_g63;c184_g217;c184_g58;c185_g126;c185_g162;c185_g204
GO:2001141	regulation_of_RNA_biosynthetic_process	BP	39	6	0.03347	c183_g63;c184_g217;c184_g58;c185_g126;c185_g162;c185_g204
GO:0042278	purine_nucleoside_metabolic_process	BP	50	7	0.0352	c183_g105;c184_g60;c185_g110;c185_g14;c185_g214;c185_g257;c185_g76
GO:0046128	purine_ribonucleoside_metabolic_process	BP	50	7	0.0352	c183_g105;c184_g60;c185_g110;c185_g14;c185_g214;c185_g257;c185_g76
GO:0006732	coenzyme_metabolic_process	BP	40	6	0.03746	c183_g105;c184_g60;c185_g110;c185_g14;c185_g214;c185_g76
GO:0051252	regulation_of_RNA_metabolic_process	BP	40	6	0.03746	c183_g63;c184_g217;c184_g58;c185_g126;c185_g162;c185_g204
GO:0044712	single-organism_catabolic_process	BP	53	7	0.04666	c183_g105;c184_g204;c184_g60;c185_g110;c185_g14;c185_g214;c185_g76
GO:1901607	alpha-amino_acid_biosynthetic_process	BP	53	7	0.04666	c184_g202;c184_g204;c184_g230;c184_g295;c184_g30;c184_g315;c184_g80
GO:0006807	nitrogen_compound_metabolic_process	BP	444	35	0.04668	c183_g105;c183_g117;c183_g63;c184_g117;c184_g126;c184_g202;c184_g204;c184_g217;c184_g230;c184_g26;c184_g295;c184_g30;c184_g315;c184_g58;c184_g60;c184_g80;c185_g110;c185_g126;c185_g137;c185_g14;c185_g146;c185_g158;c185_g162;c185_g189;c185_g204;c185_g212;c185_g214;c185_g249;c185_g257;c185_g63;c185_g65;c185_g76;c239_g1;c242_g1;c368_g1
GO:0009259	ribonucleotide_metabolic_process	BP	65	8	0.04916	c183_g105;c184_g60;c185_g110;c185_g14;c185_g214;c185_g257;c185_g65;c185_g76
GO:0004042	acetyl-CoA:L-glutamate_N-acetyltransferase_activity	MF	2	2	0.0035	c184_g202;c184_g315
GO:0004358	glutamate_N-acetyltransferase_activity	MF	2	2	0.0035	c184_g202;c184_g315
GO:0003755	peptidyl-prolyl_cis-trans_isomerase_activity	MF	3	2	0.0101	c185_g65;c185_g99
GO:0016859	cis-trans_isomerase_activity	MF	3	2	0.0101	c185_g65;c185_g99
GO:0008080	N-acetyltransferase_activity	MF	5	2	0.031	c184_g202;c184_g315
GO:0016410	N-acyltransferase_activity	MF	5	2	0.031	c184_g202;c184_g315
GO:0046873	metal_ion_transmembrane_transporter_activity	MF	13	3	0.0373	c184_g155;c185_g116;c185_g13
GO:0016799	hydrolase_activity,_hydrolyzing_N-glycosyl_compounds	MF	6	2	0.0448	c184_g26;c242_g1
GO:0016747	transferase_activity,_transferring_acyl_groups_other_than_amino-acyl_groups	MF	14	3	0.0455	c184_g202;c184_g315;c377_g1
GO:0044464	cell_part	CC	558	39	0.049	c143_g1;c183_g105;c183_g109;c183_g117;c183_g63;c184_g126;c184_g202;c184_g204;c184_g217;c184_g230;c184_g26;c184_g265;c184_g295;c184_g30;c184_g303;c184_g315;c184_g325;c184_g332;c184_g60;c184_g80;c185_g110;c185_g14;c185_g146;c185_g158;c185_g189;c185_g212;c185_g226;c185_g232;c185_g249;c185_g54;c185_g63;c185_g65;c185_g72;c185_g76;c185_g78;c185_g99;c242_g1;c308_g1;c377_g1
GO:0009289	pilus	CC	1	1	0.062	c184_g325
GO:0044096	type_IV_pilus	CC	1	1	0.062	c184_g325
GO:0005623	cell	CC	569	39	0.083	c143_g1;c183_g105;c183_g109;c183_g117;c183_g63;c184_g126;c184_g202;c184_g204;c184_g217;c184_g230;c184_g26;c184_g265;c184_g295;c184_g30;c184_g303;c184_g315;c184_g325;c184_g332;c184_g60;c184_g80;c185_g110;c185_g14;c185_g146;c185_g158;c185_g189;c185_g212;c185_g226;c185_g232;c185_g249;c185_g54;c185_g63;c185_g65;c185_g72;c185_g76;c185_g78;c185_g99;c242_g1;c308_g1;c377_g1
GO:0000015	phosphopyruvate_hydratase_complex	CC	2	1	0.121	c185_g76
GO:0009274	peptidoglycan-based_cell_wall	CC	2	1	0.121	c184_g303
GO:0009986	cell_surface	CC	2	1	0.121	c185_g76
GO:0005840	ribosome	CC	83	8	0.131	c183_g105;c183_g117;c184_g126;c184_g26;c185_g158;c185_g189;c185_g249;c185_g63
GO:0043228	non-membrane-bounded_organelle	CC	116	10	0.167	c183_g105;c183_g117;c184_g126;c184_g26;c184_g265;c185_g158;c185_g189;c185_g212;c185_g249;c185_g63
GO:0043232	intracellular_non-membrane-bounded_organelle	CC	116	10	0.167	c183_g105;c183_g117;c184_g126;c184_g26;c184_g265;c185_g158;c185_g189;c185_g212;c185_g249;c185_g63
GO:0030529	ribonucleoprotein_complex	CC	88	8	0.168	c183_g105;c183_g117;c184_g126;c184_g26;c185_g158;c185_g189;c185_g249;c185_g63
GO:0042995	cell_projection	CC	13	2	0.192	c184_g325;c185_g72
GO:0005759	mitochondrial_matrix	CC	4	1	0.227	c184_g315
GO:0030288	outer_membrane-bounded_periplasmic_space	CC	4	1	0.227	c377_g1
GO:0030312	external_encapsulating_structure	CC	28	3	0.25	c143_g1;c184_g303;c377_g1
GO:0030313	cell_envelope	CC	5	1	0.276	c377_g1
GO:0044462	external_encapsulating_structure_part	CC	5	1	0.276	c377_g1
GO:0032991	macromolecular_complex	CC	173	12	0.387	c183_g105;c183_g117;c184_g126;c184_g26;c184_g265;c185_g158;c185_g189;c185_g212;c185_g249;c185_g63;c185_g76;c242_g1
GO:0042597	periplasmic_space	CC	8	1	0.404	c377_g1
GO:0005618	cell_wall	CC	23	2	0.427	c143_g1;c184_g303
GO:0044444	cytoplasmic_part	CC	216	14	0.487	c183_g105;c183_g117;c184_g126;c184_g26;c184_g315;c184_g325;c184_g60;c185_g146;c185_g158;c185_g189;c185_g212;c185_g249;c185_g63;c185_g76
Term type	GO classification（BP：biological process, CC: cellular component and MF:molecular function）
P-value	Statistical significance was indicated when the P value was below 0.05.
