# Supplementary material for: Transcriptome, Phenotypic, and Virulence Analysis of Streptococcus sanguinis SK36 Wild Type and Its CcpA-Null Derivative (ΔCcpA)
Source: Front Cell Infect Microbiol. 2019 Dec 4;9:411. doi: 10.3389/fcimb.2019.00411 (PMC6904348; doi:10.3389/fcimb.2019.00411)
Supplement: Supplementary file 5 [file Data_Sheet_5.xlsx]

## Sheet: Supplementary file 5A
Supplementary file 5
A. KEGG pathway enrichment of up-regulated DEGs
Term	Database	ID	Input number	Background number	P-Value	Corrected P-Value	Input	Hyperlink
Pyruvate metabolism	KEGG PATHWAY	ko00620	10	18	0.00112296	0.0370578	c183_g106;c183_g13;c185_g254;c241_g1;c192_g1;c184_g57;c184_g94;c186_g1;c183_g77;c184_g294	http://www.genome.jp/kegg-bin/show_pathway?ko00620/K01006%09red/K01007%09red/K00656%09red/K00158%09red/K00925%09red/K00027%09red/K04072%09red/K00625%09red
Butanoate metabolism	KEGG PATHWAY	ko00650	5	7	0.0105087	0.173393	c184_g19;c183_g106;c184_g320;c241_g1;c183_g77	http://www.genome.jp/kegg-bin/show_pathway?ko00650/K00656%09red/K00004%09red/K04072%09red
Taurine and hypotaurine metabolism	KEGG PATHWAY	ko00430	4	6	0.0262386	0.21149	c183_g13;c184_g144;c185_g254;c184_g184	http://www.genome.jp/kegg-bin/show_pathway?ko00430/K00259%09red/K00925%09red/K00625%09red
Propanoate metabolism	KEGG PATHWAY	ko00640	4	7	0.0373478	0.21149	c183_g106;c183_g13;c185_g254;c183_g77	http://www.genome.jp/kegg-bin/show_pathway?ko00640/K00656%09red/K00925%09red/K00625%09red
Phenylalanine, tyrosine and tryptophan biosynthesis	KEGG PATHWAY	ko00400	4	7	0.0373478	0.21149	c185_g121;c286_g1;c185_g127;c185_g218	http://www.genome.jp/kegg-bin/show_pathway?ko00400/K01695%09red/K01696%09red
Carbon fixation pathways in prokaryotes	KEGG PATHWAY	ko00720	5	11	0.0384527	0.21149	c183_g13;c184_g57;c184_g94;c186_g1;c185_g254	http://www.genome.jp/kegg-bin/show_pathway?ko00720/K00925%09red/K00625%09red/K01006%09red/K01007%09red
Phosphotransferase system (PTS)	KEGG PATHWAY	ko02060	5	12	0.0492059	0.23197	c184_g82;c132_g2;c184_g156;c276_g1;c184_g248	http://www.genome.jp/kegg-bin/show_pathway?ko02060/K02761%09red/K02775%09red/K02793%09red/K02779%09red/K02819%09red
Starch and sucrose metabolism	KEGG PATHWAY	ko00500	6	22	0.122973	0.507264	c185_g50;c185_g52;c185_g70;c185_g93;c185_g109;c184_g248	http://www.genome.jp/kegg-bin/show_pathway?ko00500/K00688%09red/K00703%09red/K00975%09red/K02819%09red
ABC transporters	KEGG PATHWAY	ko02010	8	34	0.138738	0.508705	c246_g1;c183_g45;c183_g47;c134_g2;c24_g1;c183_g84;c183_g90;c184_g170	http://www.genome.jp/kegg-bin/show_pathway?ko02010/K15771%09red/K10112%09red/K15585%09red/K15586%09red/K06148%09red/K10117%09red/K15580%09red
Amino sugar and nucleotide sugar metabolism	KEGG PATHWAY	ko00520	5	21	0.213096	0.703216	c184_g82;c185_g52;c184_g156;c386_g1;c525_g1	http://www.genome.jp/kegg-bin/show_pathway?ko00520/K00965%09red/K00849%09red/K00975%09red/K02779%09red/K02793%09red
Galactose metabolism	KEGG PATHWAY	ko00052	3	12	0.283295	0.787944	c276_g1;c386_g1;c525_g1	http://www.genome.jp/kegg-bin/show_pathway?ko00052/K00965%09red/K00849%09red/K02775%09red
Bacterial secretion system	KEGG PATHWAY	ko03070	2	7	0.310402	0.787944	c184_g290;c184_g125	http://www.genome.jp/kegg-bin/show_pathway?ko03070/K03070%09red/K03076%09red
Protein export	KEGG PATHWAY	ko03060	2	7	0.310402	0.787944	c184_g290;c184_g125	http://www.genome.jp/kegg-bin/show_pathway?ko03060/K03070%09red/K03076%09red
Glycine, serine and threonine metabolism	KEGG PATHWAY	ko00260	4	20	0.348137	0.82061	c185_g121;c286_g1;c185_g127;c185_g218	http://www.genome.jp/kegg-bin/show_pathway?ko00260/K01695%09red/K01696%09red
Carbon fixation in photosynthetic organisms	KEGG PATHWAY	ko00710	3	16	0.427281	0.872741	c185_g150;c184_g57;c184_g94	http://www.genome.jp/kegg-bin/show_pathway?ko00710/K01006%09red/K01807%09red
Carbon metabolism	KEGG PATHWAY	ko01200	7	44	0.452789	0.872741	c183_g13;c185_g150;c185_g254;c192_g1;c184_g57;c184_g94;c186_g1	http://www.genome.jp/kegg-bin/show_pathway?ko01200/K01006%09red/K01007%09red/K01807%09red/K00925%09red/K00027%09red/K00625%09red
Valine, leucine and isoleucine biosynthesis	KEGG PATHWAY	ko00290	1	5	0.550172	0.872741	c183_g96	http://www.genome.jp/kegg-bin/show_pathway?ko00290/K01703%09red
Glycerolipid metabolism	KEGG PATHWAY	ko00561	1	5	0.550172	0.872741	c185_g32	http://www.genome.jp/kegg-bin/show_pathway?ko00561/K03429%09red
Methane metabolism	KEGG PATHWAY	ko00680	3	20	0.560351	0.872741	c183_g13;c185_g254;c186_g1	http://www.genome.jp/kegg-bin/show_pathway?ko00680/K00925%09red/K00625%09red/K01007%09red
DNA replication	KEGG PATHWAY	ko03030	2	13	0.574676	0.872741	c185_g148;c185_g125	http://www.genome.jp/kegg-bin/show_pathway?ko03030/K03763%09red
Pentose phosphate pathway	KEGG PATHWAY	ko00030	2	13	0.574676	0.872741	c185_g150;c185_g62	http://www.genome.jp/kegg-bin/show_pathway?ko00030/K01839%09red/K01807%09red
Alanine, aspartate and glutamate metabolism	KEGG PATHWAY	ko00250	2	15	0.645186	0.872741	c184_g144;c184_g184	http://www.genome.jp/kegg-bin/show_pathway?ko00250/K00259%09red
Purine metabolism	KEGG PATHWAY	ko00230	4	33	0.696808	0.872741	c184_g5;c185_g148;c185_g62;c185_g125	http://www.genome.jp/kegg-bin/show_pathway?ko00230/K03763%09red/K00527%09red/K01839%09red
Homologous recombination	KEGG PATHWAY	ko03440	2	17	0.706227	0.872741	c185_g148;c185_g125	http://www.genome.jp/kegg-bin/show_pathway?ko03440/K03763%09red
Mismatch repair	KEGG PATHWAY	ko03430	2	17	0.706227	0.872741	c185_g148;c185_g125	http://www.genome.jp/kegg-bin/show_pathway?ko03430/K03763%09red
Glycolysis / Gluconeogenesis	KEGG PATHWAY	ko00010	3	26	0.721324	0.872741	c184_g156;c241_g1;c184_g63	http://www.genome.jp/kegg-bin/show_pathway?ko00010/K13953%09red/K04072%09red/K02779%09red
Oxidative phosphorylation	KEGG PATHWAY	ko00190	3	28	0.763723	0.872741	c184_g15;c184_g133;c184_g310	http://www.genome.jp/kegg-bin/show_pathway?ko00190/K02117%09red
Pyrimidine metabolism	KEGG PATHWAY	ko00240	4	38	0.789817	0.872741	c184_g5;c185_g148;c185_g125;c185_g235	http://www.genome.jp/kegg-bin/show_pathway?ko00240/K00527%09red/K03763%09red/K00756%09red
Biosynthesis of amino acids	KEGG PATHWAY	ko01230	6	57	0.820441	0.872741	c185_g150;c185_g218;c185_g121;c185_g127;c286_g1;c183_g96	http://www.genome.jp/kegg-bin/show_pathway?ko01230/K01695%09red/K01696%09red/K01703%09red/K01807%09red
Porphyrin and chlorophyll metabolism	KEGG PATHWAY	ko00860	1	12	0.824118	0.872741	c183_g35	http://www.genome.jp/kegg-bin/show_pathway?ko00860/K00768%09red
2-Oxocarboxylic acid metabolism	KEGG PATHWAY	ko01210	1	12	0.824118	0.872741	c183_g96	http://www.genome.jp/kegg-bin/show_pathway?ko01210/K01703%09red
Fructose and mannose metabolism	KEGG PATHWAY	ko00051	1	13	0.846295	0.872741	c184_g82	http://www.genome.jp/kegg-bin/show_pathway?ko00051/K02793%09red
Two-component system	KEGG PATHWAY	ko02020	1	16	0.89751	0.89751	c192_g1	http://www.genome.jp/kegg-bin/show_pathway?ko02020/K00027%09red

## Sheet: Supplementary file 5B
Supplementary file 5
B. KEGG pathway enrichment of down-regulated DEGs
Term	Database	ID	Input number	Background number	P-Value	Corrected P-Value	Input	Hyperlink
Arginine and proline metabolism	KEGG PATHWAY	ko00330	6	14	0.00234018	0.0391316	c184_g315;c184_g30;c184_g204;c184_g202;c184_g230;c184_g80	http://www.genome.jp/kegg-bin/show_pathway?ko00330/K01755%09red/K00145%09red/K01940%09red/K00818%09red/K00620%09red/K00930%09red
Biosynthesis of amino acids	KEGG PATHWAY	ko01230	12	57	0.00326096	0.0391316	c185_g14;c185_g214;c184_g315;c184_g30;c185_g65;c184_g204;c185_g76;c184_g202;c184_g230;c184_g60;c184_g80;c184_g295	http://www.genome.jp/kegg-bin/show_pathway?ko01230/K01755%09red/K01689%09red/K01834%09red/K00145%09red/K01940%09red/K00818%09red/K00948%09red/K01624%09red/K00928%09red/K00873%09red/K00620%09red/K00930%09red
2-Oxocarboxylic acid metabolism	KEGG PATHWAY	ko01210	5	12	0.00613467	0.0490774	c184_g230;c184_g315;c184_g202;c184_g204;c184_g295	http://www.genome.jp/kegg-bin/show_pathway?ko01210/K00928%09red/K00818%09red/K00145%09red/K00620%09red/K00930%09red
Ribosome	KEGG PATHWAY	ko03010	4	25	0.164791	0.676877	c185_g63;c185_g189;c183_g105;c184_g126	http://www.genome.jp/kegg-bin/show_pathway?ko03010/K02884%09red/K02888%09red/K02959%09red/K02945%09red
Glycolysis / Gluconeogenesis	KEGG PATHWAY	ko00010	4	26	0.179979	0.676877	c185_g14;c185_g214;c185_g76;c184_g60	http://www.genome.jp/kegg-bin/show_pathway?ko00010/K00873%09red/K01689%09red/K01624%09red/K01834%09red
Methane metabolism	KEGG PATHWAY	ko00680	3	20	0.243431	0.676877	c185_g76;c185_g214;c184_g60	http://www.genome.jp/kegg-bin/show_pathway?ko00680/K01834%09red/K01624%09red/K01689%09red
Purine metabolism	KEGG PATHWAY	ko00230	4	33	0.296663	0.676877	c185_g14;c185_g204;c185_g65;c185_g257	http://www.genome.jp/kegg-bin/show_pathway?ko00230/K00873%09red/K03048%09red/K00948%09red/K00088%09red
Carbon metabolism	KEGG PATHWAY	ko01200	5	44	0.300452	0.676877	c185_g14;c185_g214;c185_g65;c185_g76;c184_g60	http://www.genome.jp/kegg-bin/show_pathway?ko01200/K00873%09red/K00948%09red/K01689%09red/K01624%09red/K01834%09red
Pentose phosphate pathway	KEGG PATHWAY	ko00030	2	13	0.310451	0.676877	c185_g214;c185_g65	http://www.genome.jp/kegg-bin/show_pathway?ko00030/K00948%09red/K01624%09red
ABC transporters	KEGG PATHWAY	ko02010	4	34	0.314276	0.676877	c185_g226;c242_g1;c185_g78;c183_g109	http://www.genome.jp/kegg-bin/show_pathway?ko02010/K03523%09red/K15580%09red/K10039%09red
Alanine, aspartate and glutamate metabolism	KEGG PATHWAY	ko00250	2	15	0.367129	0.676877	c184_g30;c184_g80	http://www.genome.jp/kegg-bin/show_pathway?ko00250/K01755%09red/K01940%09red
Drug metabolism - other enzymes	KEGG PATHWAY	ko00983	1	5	0.37343	0.676877	c185_g257	http://www.genome.jp/kegg-bin/show_pathway?ko00983/K00088%09red
Base excision repair	KEGG PATHWAY	ko03410	1	5	0.37343	0.676877	c184_g26	http://www.genome.jp/kegg-bin/show_pathway?ko03410/K01246%09red
Two-component system	KEGG PATHWAY	ko02020	2	16	0.394845	0.676877	c307_g1;c204_g1	http://www.genome.jp/kegg-bin/show_pathway?ko02020/K12294%09red/K12296%09red
Bacterial secretion system	KEGG PATHWAY	ko03070	1	7	0.464238	0.696357	c184_g192	http://www.genome.jp/kegg-bin/show_pathway?ko03070/K03217%09red
Protein export	KEGG PATHWAY	ko03060	1	7	0.464238	0.696357	c184_g192	http://www.genome.jp/kegg-bin/show_pathway?ko03060/K03217%09red
Glycine, serine and threonine metabolism	KEGG PATHWAY	ko00260	2	20	0.499624	0.705351	c184_g60;c184_g295	http://www.genome.jp/kegg-bin/show_pathway?ko00260/K00928%09red/K01834%09red
Cysteine and methionine metabolism	KEGG PATHWAY	ko00270	1	10	0.576677	0.728435	c184_g295	http://www.genome.jp/kegg-bin/show_pathway?ko00270/K00928%09red
Lysine biosynthesis	KEGG PATHWAY	ko00300	1	10	0.576677	0.728435	c184_g295	http://www.genome.jp/kegg-bin/show_pathway?ko00300/K00928%09red
Fructose and mannose metabolism	KEGG PATHWAY	ko00051	1	13	0.665802	0.760916	c185_g214	http://www.genome.jp/kegg-bin/show_pathway?ko00051/K01624%09red
RNA degradation	KEGG PATHWAY	ko03018	1	13	0.665802	0.760916	c185_g76	http://www.genome.jp/kegg-bin/show_pathway?ko03018/K01689%09red
Carbon fixation in photosynthetic organisms	KEGG PATHWAY	ko00710	1	16	0.736386	0.80333	c185_g214	http://www.genome.jp/kegg-bin/show_pathway?ko00710/K01624%09red
Pyruvate metabolism	KEGG PATHWAY	ko00620	1	18	0.775058	0.808756	c185_g14	http://www.genome.jp/kegg-bin/show_pathway?ko00620/K00873%09red
Pyrimidine metabolism	KEGG PATHWAY	ko00240	1	38	0.954936	0.954936	c185_g204	http://www.genome.jp/kegg-bin/show_pathway?ko00240/K03048%09red
